# Supplementary material for: Effects of a Vegetarian Diet on Cardiometabolic Risk Factors, Gut Microbiota, and Plasma Metabolome in Subjects With Ischemic Heart Disease: A Randomized, Crossover Study
Source: PubMed Central journal article supplement — J Am Heart Assoc. 2020 Sep 6;9(18):e016518. doi: 10.1161/JAHA.120.016518 (PMC7726986; doi:10.1161/jaha.120.016518), 2020-09-06
Supplement: JAH3-9-e016518-s001.pdf [file JAH3-9-e016518-s001.pdf]

# **SUPPLEMENTAL MATERIAL**

## Data S1.

### Supplemental Methods

#### Meal plan used in the study for meat diet

- The energy level of the average diet was set at 2400 kcal per day. Adjustments will be made to accommodate individual requirements according to energy intake strata.

#### Background information

- In the VERDI study we want to investigate the effects on cardiometabolic risk factors of a lacto-ovo-vegetarian diet vs. a diet with meat in quantities corresponding to average meat intake in the Swedish population. You will, during two four-week-periods, follow a meal plan adapted to your calorie requirements so that you do not lose weight during the trial. It is important that you follow the meal plan.

#### Lunch and dinner

- During two four-week-periods, you will be provided with frozen, ready-made dishes for lunch and dinner. You are advised to consume the entire meal. In addition, you are given an individual meal plan which you should strictly follow.

#### Meal plan

- You will eat breakfast, snacks, and side dishes according to the meal plan adjusted to meet your energy requirements.
- The meal plan includes a number of alternatives for breakfast, snacks, and side dishes.
- The side dishes consist mainly of bread with toppings and can be consumed along with the main dish for lunch and dinner or between meals.

#### Please note

- It is important that you complete the daily food diary. In the food diary you record which alternative you have chosen for breakfast, snack, and side dish. Please note any deviations from the meal plan.
- It is important that you follow the meal plan, but you are allowed to deviate from it one day each week. You must still eat the ready-made frozen dishes during this day.

Each day choose **one** of the five breakfast alternatives below. Try to vary your choice from day to day.

- Fill in the food diary and check the alternative you have chosen.
- You do not have to eat the breakfast at any particular time, and you do not have to eat the entire breakfast at one time.

| 1. Yoghurt with oat cereal, sunflower seeds and apple sauce. Sandwich with butter, ham, and cheese. |                                 |                            |
|-----------------------------------------------------------------------------------------------------|---------------------------------|----------------------------|
| <i>Food item</i>                                                                                    | <i>Quantity</i>                 | <i>Alternative</i>         |
| Yoghurt (0.5% fat)                                                                                  | 2.5 dl                          | Sour milk (0.5% fat)       |
| Oat cereal                                                                                          | 2 dl                            | Bran flakes, rye cereal    |
| Sunflower seeds                                                                                     | 1.5 tbsp                        | Pumpkin seeds, nuts        |
| Applesauce                                                                                          | 2 tbsp                          | Banana, raisins, jam       |
| Whole grain rye bread                                                                               | 1-1.5 slices (50 g)             | Rye crisp bread (3 slices) |
| Butter (Bregott mellan)                                                                             | 3 tsp                           |                            |
| Ham                                                                                                 | 2.5 slices (or 5-6 thin slices) |                            |
| Bell pepper                                                                                         | 2 slices                        | Tomato, cucumber           |

| 2. Oat porridge with raisins and milk. Sandwich with butter, ham and cheese |                                 |                              |
|-----------------------------------------------------------------------------|---------------------------------|------------------------------|
| <i>Food item</i>                                                            | <i>Quantity</i>                 | <i>Alternative</i>           |
| Rolled oats + water                                                         | 1 dl + 2 dl                     | Rye flakes, Buckwheat flakes |
| Milk (1.5% fat)                                                             | 2.5 dl                          |                              |
| Raisins                                                                     | 2.5 tbsp                        | Banana, jam                  |
| White bread                                                                 | 1-2 slices (50 g)               | Wheat crisp bread (3 slices) |
| Butter (Bregott mellan)                                                     | 4 tsp                           |                              |
| Ham                                                                         | 2.5 slices (or 5-6 thin slices) |                              |
| Cucumber                                                                    | 4 slices                        | Bell pepper, tomato          |

| 3. Sandwich with butter, ham, eggs and bell pepper. Banana. |                                 |                              |
|-------------------------------------------------------------|---------------------------------|------------------------------|
| <i>Food item</i>                                            | <i>Quantity</i>                 | <i>Alternative</i>           |
| White bread                                                 | 2 large slices (or 3 small)     | Wheat crisp bread (3 slices) |
| Butter (Bregott mellan)                                     | 2 tsp                           |                              |
| Ham                                                         | 2.5 slices (or 5-6 thin slices) |                              |
| Eggs                                                        | 1                               | Boiled, fried, scrambled     |
| Cheese (17% fat)                                            | 2 slices                        |                              |
| Bell pepper                                                 | 2 slices                        | Cucumber, tomato             |
| Banana                                                      | 1 piece                         |                              |

| 4. Sandwichs with butter, ham, cheese and tomato. Fruit yoghurt. |                                 |                            |
|------------------------------------------------------------------|---------------------------------|----------------------------|
| <i>Food item</i>                                                 | <i>Quantity</i>                 | <i>Alternative</i>         |
| Whole grain rye bread                                            | 2 slices (80 g)                 | Rye crisp bread (4 slices) |
| Butter (Bregott mellan)                                          | 4 tsp                           |                            |
| Ham                                                              | 2.5 slices (or 5-6 thin slices) |                            |
| Cheese (17% fat)                                                 | 1.5 slices                      |                            |
| Tomato                                                           | 2-3 slices                      | Cucumber, bell pepper      |
| Fruit yoghurt (0.5%)                                             | 2.5 dl                          | Yoghurt + jam or raisins   |

| 5. Yoghurt with muesli and banana. Wheat crisp bread with butter, ham and bell pepper. |                                 |                     |
|----------------------------------------------------------------------------------------|---------------------------------|---------------------|
| <i>Food item</i>                                                                       | <i>Quantity</i>                 | <i>Alternative</i>  |
| Yoghurt (0.5% fat)                                                                     | 2.5 dl                          | Filmjök (0.5% fat)  |
| Muesli with fruit and nuts                                                             | 0,75 dl                         |                     |
| Banana                                                                                 | 1                               |                     |
| Wheat crisp bread                                                                      | 2 slices                        | 1 slice white bread |
| Butter (Bregott mellan)                                                                | 4 tsp                           |                     |
| Ham                                                                                    | 2.5 slices (or 5-6 thin slices) |                     |
| Bell pepper                                                                            | 2 slices                        | Cucumber, tomato    |

#### Food items

- *Whole grain rye bread* refers to breads such as Lingongrova, Gott och gräddat, Frökusar, Skördelycka.
- *White bread* refers to breads such as formfranska, bergis, rost/toast.
- *Muesli with fruit and nuts* refers to cereal such as Familjemuesli, F-muesli.
- *Oat cereal (Havrefras)* refers to cereal such as havrefras, Havrekuddar, Havreringar, rågras, råkuddar, rågringar

Every day choose **two** of the six light meal/snack alternatives below. Preferably vary your choice from day to day.

- Complete the food diary and check the alternative you have chosen.
- You do not have to eat the light meals/snacks at any particular time, and you can eat them at the same time or separately.

| 1. Yoghurt with raisins and sunflower seeds. Fruit |                 |                         |
|----------------------------------------------------|-----------------|-------------------------|
| <i>Food item</i>                                   | <i>Quantity</i> | <i>Alternative</i>      |
| Yoghurt (0.5% fat)                                 | 2 dl            | Sour milk (0.5%)        |
| Raisins                                            | 3 tbsp          | Banana, jam             |
| Sunflower seeds                                    | 1.5 tbsp        | Pumpkin seeds, nuts     |
| Fruit (apple)                                      | 1 piece         | Pear, orange, nectarine |

| 2. Sandwich with cottage cheese and avocado. Fruit |                 |                              |
|----------------------------------------------------|-----------------|------------------------------|
| <i>Food item</i>                                   | <i>Quantity</i> | <i>Alternative</i>           |
| White bread                                        | 2 slices        | Wheat crisp bread (4 slices) |
| Cottage cheese (4% fat)                            | 2 tbsp          | Quark, cream cheese (4%)     |
| Avocado                                            | 0.25            |                              |
| Fruit (apple)                                      | 1 piece         | Pear, orange, nectarine      |

| 3. Cheese sandwich. Fruit |                 |                            |
|---------------------------|-----------------|----------------------------|
| <i>Food item</i>          | <i>Quantity</i> | <i>Alternative</i>         |
| Whole grain rye bread     | 2 slices        | Rye crisp bread (4 slices) |
| Butter (Bregott mellan)   | 2 tsp           |                            |
| Cheese (17% fat)          | 1.5 slices      |                            |
| Fruit (apple)             | 1 piece         | Pear, orange, nectarine    |

| 4. Wasa-sandwich and yoghurt drink. Fruit |                 |                                                |
|-------------------------------------------|-----------------|------------------------------------------------|
| <i>Food item</i>                          | <i>Quantity</i> | <i>Alternative</i>                             |
| Wasa-sandwich                             | 1 piece         | Crispbread (2 slices) +<br>Cream cheese 2 tbsp |

|               |         |                         |
|---------------|---------|-------------------------|
| Yoghurt drink | 2.5 dl  | Fruit yoghurt (2 dl)    |
| Fruit (apple) | 1 piece | Pear, orange, nectarine |

#### 5. Rusks with cheese and marmalade and fruit

| <i>Food item</i>        | <i>Quantity</i> | <i>Alternative</i>      |
|-------------------------|-----------------|-------------------------|
| Whole grain rusks       | 1.5 – 2 pieces  |                         |
| Butter (Bregott mellan) | 2 tsp           |                         |
| Cheese (17%)            | 2 slices        |                         |
| Marmalade               | 1 tbsp          |                         |
| Fruit (apple)           | 1 piece         | Pear, orange, nectarine |

#### 6. Rusks with peanut butter and fruit

| <i>Food item</i> | <i>Quantity</i> | <i>Alternative</i>      |
|------------------|-----------------|-------------------------|
| Wheat rusks      | 2 pieces        |                         |
| Peanut butter    | 4 tsp           |                         |
| Fruit (apple)    | 1 piece         | Pear, orange, nectarine |

- The side dishes consist of bread with topping and can be served along with the ready-made lunch or dinner dish or at any time during the day.
- Each day, choose **one** of the five alternatives. Preferably vary your choice from day to day.
- Fill in the food diary and check the alternative you have chosen.

|                            |          |
|----------------------------|----------|
| 1.                         |          |
| Crisp bread (Wasa husman)  | 2 slices |
| Margarine (Bregott mellan) | 1 tsp    |

|                          |          |
|--------------------------|----------|
| 2.                       |          |
| Crisp bread (Finn crisp) | 3 slices |
| Hummus                   | 2 tbsp   |

|                                  |             |
|----------------------------------|-------------|
| 3.                               |             |
| Whole grain rye bread (rågkusar) | 0.5 rågkuse |
| Light mayonnaise (35% fat)       | 2 tsp       |

|                          |            |
|--------------------------|------------|
| 4.                       |            |
| Crisp bread (Wasa sport) | 2 slices   |
| Avocado                  | 0.25 piece |

|                   |          |
|-------------------|----------|
| 5.                |          |
| Whole grain rusks | 2 pieces |
| Peanut butter     | 1.5 tsp  |

## **Analysis of cardiometabolic risk factors, gut microbiota, and plasma metabolome**

### **Anthropometric measurements and assessment of quality of life**

A digital automatic sphygmomanometer (OMRON M6 AC, OMRON HEALTHCARE Co., Ltd. Kyoto, Japan) was used to measure blood pressure and heart rate. Blood pressure was measured in the right arm after five minutes of seated rest. Body height in centimeters was measured at baseline. Body weight in kilograms was measured at the four monitoring visits with the participants dressed in light clothing without shoes. BMI was calculated as body weight in kilograms divided by height in meters squared. At all monitoring visits, quality of life was assessed with the EuroQoL five-dimension questionnaire (EQ5D), which assesses mobility, self-care, usual activities, pain/discomfort, and anxiety/depression, with results presented on a visual analogue scale.

### **Blood sampling and biochemical analyses**

Venous blood samples were collected at the four monitoring visits in evacuated plastic tubes (VACUETTE® TUBE, Greiner Bio-One GmbH, Kremsmunster, Austria). Upon collection, the tubes were gently inverted 10 times and placed on ice. Samples were centrifuged in a cooling system at 1560 x g for 10 min at -40°C and stored at -80°C in aliquots for analysis.

Analyses of samples were conducted at the Clinical Chemistry Laboratory, Örebro University Hospital. Total cholesterol (TC), low density lipoprotein cholesterol (LDL-C), high density lipoprotein cholesterol (HDL-C), and triglycerides (TG) were measured by a dry chemistry method using a membrane and colorimetric detection in a Vitros 5.1 FS chemistry system (Ortho Clinical Diagnostics and Johnson & Johnson, Stockholm, Sweden). High-sensitivity CRP (hs-CRP), apolipoprotein A1 (ApoA1), and apolipoprotein B (ApoB) were measured with two-site sandwich assays on a Siemens ADVIA 1800 Chemistry System (Siemens Healthcare,



Upplands Väsby, Sweden). A six-point calibration curve and pooled samples for quality control were also assayed to confirm accurate measurement according to SS-EN ISO/IEC 15 189, STAFS 2011:33 and STAFS 2010:10 (SWEDAC). The HbA<sub>1c</sub> was measured by the gold standard method on a Tosho G8 High Performance Liquid Chromatography instrument (Tosho Bioscience, Tessenderlo, Belgium).

We used a sandwich ELISA assay kit (Merckodia, Uppsala, Sweden) for quantitative measure of plasma oxidized LDL-C levels. The assay uses the specific murine monoclonal antibody mAb-4E6 directed against the oxidized antigenic determinants on the oxidized ApoB molecule, as described by Holvoet et al. Fresh-frozen plasma (25 µL) was diluted in two steps to a final dilution of 1/6561 and combined with 100 µL of assay buffer and 25 µL of each calibrator. Control and diluted samples were added to appropriate wells on the plate. Plates were incubated in a plate shaker (700–900 rpm) for 2 hours at 20°C and washed six times with 700 µL wash buffer per well using an automatic plate washer. The plates were inverted and tapped against absorbent tissue, and 100 µL of enzyme conjugate was added to each well. Following a second incubation for 1 h on a plate shaker, the plates were washed, and 200 µL of substrate tetramethylbenzidine was added. Finally, the plates were incubated for 15 min on the bench, 50 µL of a solution to stop the reaction was added, and the optical density was measured spectrophotometrically at 450 nm. Two commercially available controls were included on each plate (n=3) for internal quality control. The intra-assay coefficient of variation for oxidized LDL-C concentration was <10% for 95.7% of samples.

### **16S rRNA gene sequencing for gut microbiome**

Fecal samples were collected in sterile stool tubes on the day prior to each baseline/follow-up visit and stored at Örebro biobank at -80°C until extraction. DNA was extracted from each

sample by repeated bead-beating and was subjected to 16S rRNA gene sequencing in an Illumina Miseq instrument (Illumina, San Diego, California, USA) using the 515F and 806R primers and the V2 kit (2 × 250 bp paired-end reads) (Illumina).

Illumina reads were merged using Usearch v. 11 64-bit allowing for up to 30 mismatches in the alignment of the paired-end reads, while discarding reads with a merged length greater than 270 bp and fewer than 230 bp. The merged reads were quality-filtered based on expected errors, removing reads above the threshold of 1.0. The merged reads were converted to zero-radius operational taxonomic units (ZOTU) by compiling the sequences into sets of unique reads and performing error-correction using the UNOISE3 algorithm, discarding sequences with fewer than four reads. The ZOTUs were assigned taxonomy using DADA2's assign Taxonomy (minBoot = 80) and were assigned species, using the properly formatted version of the Silva v. 132 database. A phylogenetic tree of the sequence attributed to each ZOTU was created by aligning the reads using MAFFT v. 7.407 and FastTree v. 2.1.10. The process produced 3,126 ZOTUs after removing dropouts, comprising 8,344,360 reads from 102 samples. The OTU-table was subjected to filtering based on abundance, and ZOTUs below 0.002% of total reads in the table were discarded,<sup>13</sup> resulting in 1,264 amplicon sequence variants in 102 samples (8,253,321 reads). Data were rarefied to the minimum sample sequence depth (56,103 reads) to reduce the effect of sequencing depth.

### **Measurement of fecal short chain fatty acids and branched chain fatty acids**

Fecal concentrations of the short chain fatty acids (SCFA) acetate, propionate, and butyrate and branched chain fatty acids (BCFA) isobutyrate and isovalerate, as well as succinate and lactate, were determined using gas chromatograph-mass spectrometry (Agilent Technologies) as previously described. In brief, 100 mg of frozen fecal material was

transferred to a 16 x 125 mm glass tube fitted with a screw cap, and a volume of 100  $\mu\text{L}$  of internal standard stock solution [(1- $^{13}\text{C}$ )acetate, (2H $_6$ )propionate 1 M, ( $^{13}\text{C}_4$ )butyrate 0.5 M, (1- $^{13}\text{C}_1$ )isobutyrate, and (1- $^{13}\text{C}$ )isovalerate 0.1 M] was added. Prior to extraction, samples were freeze-dried at  $-50^\circ\text{C}$  for 3 h. After acidification with 50  $\mu\text{L}$  of 37% HCl, the organic acids were extracted twice in 2 mL of diethyl ether. A 500  $\mu\text{L}$  aliquot of the extracted sample was mixed with 50  $\mu\text{L}$  of N-tert-butyltrimethylsilyl-N-methyltrifluoroacetamide (Sigma) at  $20^\circ\text{C}$ . One  $\mu\text{L}$  of the derived material was injected into a gas chromatograph (Agilent Technologies 7890 A) coupled to a mass spectrometer detector (Agilent Technologies 5975 C). Temperature was increased in a linear gradient consisting of initial temperature of  $65^\circ\text{C}$  for 6 min, increase to  $260^\circ\text{C}$  at  $15^\circ\text{C min}^{-1}$ , and increase to and held at  $280^\circ\text{C}$  for 5 min. The injector and transfer line temperatures were  $250^\circ\text{C}$ . Quantitation was completed in ion-monitoring acquisition mode by comparison to labelled internal standards, with the m/z ratios 117 (acetic acid), 131 (propionic acid), 145 (butyric acid), 146 (isobutyric acid), 159 (isovaleric acid), 121 [(2H $_2$ )- and (1- $^{13}\text{C}$ )acetate], 136 [(2H $_5$ )propionate], 146 [(1- $^{13}\text{C}_1$ )isobutyrate], 149 [( $^{13}\text{C}_4$ ) butyrate], 160 [(1- $^{13}\text{C}$ )isovalerate].

### **Plasma metabolome analysis**

Plasma samples were de-proteinized using ultracentrifugation and analyzed by high performance liquid chromatography-quadrupole time-of-flight mass spectrometry (HPLC-qTOF-MS/MS, Agilent qTOF 6520) (Agilent Technologies). Reverse-phase chromatography was applied using an ACQUITY UPLC HSS T3 Column ( $130\text{\AA}$ ,  $1.8\ \mu\text{m}$ ,  $2.1\ \text{mm}\times 100\ \text{mm}$  (Waters) in positive (ESI+) and negative electrospray ionization (ESI-) modes.

The mobile phase delivered at 400  $\mu\text{L}/\text{min}$  consisted of eluent A (MilliQ purified water) (Millipore) and eluent B (methanol, methanol CHROMASOLV™ LC-MS Ultra) (Honeywell

Riedel-de Haen), both containing 0.04% (vol:vol) formic acid. The ESI source was operated under the following conditions: gas (nitrogen) temperature 175°C and dry gas flow 10 L/min, nebulizer pressure 45 PSI, capillary voltage 3500 V, fragmenter 125 V, and a skimmer of 65V. For data acquisition, a 2-GHz extended dynamic range mode was used, with the instrument set to acquire data over the  $m/z$  range 50–1700. Data were collected in centroid mode at an acquisition rate of 1.67 spectra/s with an abundance threshold of 200 counts. Continuous mass axis calibration was performed in an infusion solution throughout the runs by monitoring reference ions  $m/z$  121.050873 and  $m/z$  922.009798 for positive mode and  $m/z$  112.988900 and 966.000725 for negative mode.

Plasma samples were analyzed in two batches. Within-individual samples were analyzed in the same batch, with full within-batch randomization. The stability and functionality of the system were monitored throughout the instrumental analyses using pooled plasma samples as quality control. Data acquisition used MassHunter Acquisition software (Agilent Technologies).

Raw data acquired in each analytical batch were converted to mzXL format, and deconvolution was performed with the open source R package “XCMS.” Key parameters of XCMS including peak detection, alignment, and correspondence were optimized using the R package “IPO” to increase the reliability and stability of processed metabolomics data. The number of obtained metabolite features (mass spectral peak, a molecular entity with a unique mass-to-charge ratio and retention time as measured by LC-MS instrument) with ESI+ and ESI- was 1645 and 1363, respectively. The within- and between- batch measurement errors due to shifts in retention time, mass-to-charge ratio ( $m/z$ ), and intensity of metabolite features between analytical runs were corrected using R package “batchCorr.” After correction,

metabolite features passing the quality control tests (CV<0.3) in both batches were considered qualified features and were subjected to statistical analysis. In total, 840 and 982 features from the ESI+ and ESI- were retained after stringent normalization procedures.

Plasma trimethylamine N-oxide (TMAO), choline, carnitine, and acetyl-carnitine were measured by liquid chromatography tandem mass spectrometry (LC-MS/MS) analyzed on an Exion UHPLC coupled to a QTRAP 6500+ MS/MS system, both from AB Sciex LLC (Framingham, USA). Plasma (50 µL) was thoroughly mixed with methanol (150 µL) and internal standard solution (50 µL) containing d9-TMAO, d11-choline, and d9-carnitine was centrifuged at 15 000 x g at 5°C for 10 min and supernatants collected on vials for analysis. Calibration curves were obtained from a stock solution containing all compounds. The separation used a Waters BEH Amide column (100 x2.1 mm, 1.7 µm) at 35°C with flow of 0.75 mL/min. The gradient was 0% B 0–1.3 min to 80% B at 4.5 min (B was 10mM ammonium formate in acetonitrile and A 10 mM ammonium formate in water, pH 3, injection volume 0.3 µL). The analytes were detected using positive electrospray ionization. Transitions were TMAO 76.1→58.2, choline 105.1→61, L-carnitine 163.1→116.9, acetyl-carnitine 204.1→85.1.

## Statistical analysis

All analyses were performed in R v. 3.5.1. (R Foundation for Statistical Computing, Vienna, Austria).

| Packages | Purpose                      | References and open source tutorials                                                                                                                                            |
|----------|------------------------------|---------------------------------------------------------------------------------------------------------------------------------------------------------------------------------|
| XCMS     | Metabolomics data processing | <a href="https://bioconductor.org/packages/release/bioc/vignettes/xcms/inst/doc/xcms.html">https://bioconductor.org/packages/release/bioc/vignettes/xcms/inst/doc/xcms.html</a> |
| IPO      | XCMS parameters optimization | <a href="https://bioconductor.org/packages/release/bioc/vignettes/IPO/inst/doc/IPO.html">https://bioconductor.org/packages/release/bioc/vignettes/IPO/inst/doc/IPO.html</a>     |

|           |                                          |                                                                                                                                                                           |
|-----------|------------------------------------------|---------------------------------------------------------------------------------------------------------------------------------------------------------------------------|
| mixOmics  | Supervised modelling                     | <a href="http://mixomics.org/">http://mixomics.org/</a>                                                                                                                   |
| batchCorr | Metabolomics data normalization          | <a href="https://www.ncbi.nlm.nih.gov/pubmed/27746707">https://www.ncbi.nlm.nih.gov/pubmed/27746707</a>                                                                   |
| MUVR      | Supervised modelling                     | <a href="https://academic.oup.com/bioinformatics/article/35/6/972/5085367">https://academic.oup.com/bioinformatics/article/35/6/972/5085367</a>                           |
| vegan     | Microbiota data analyses                 | <a href="http://cc.oulu.fi/~jarioksa/opetus/metodi/vegantutor.pdf">http://cc.oulu.fi/~jarioksa/opetus/metodi/vegantutor.pdf</a>                                           |
| ggplot2   | Results visualization and interpretation | <a href="https://cran.r-project.org/web/packages/ggplot2/ggplot2.pdf">https://cran.r-project.org/web/packages/ggplot2/ggplot2.pdf</a>                                     |
| phyloseq  | Microbiome census data analysis          | <a href="https://joey711.github.io/phyloseq/">https://joey711.github.io/phyloseq/</a>                                                                                     |
| Picante   | Microbiota diversity calculation         | <a href="https://cran.r-project.org/web/packages/picante/vignettes/picante-intro.pdf">https://cran.r-project.org/web/packages/picante/vignettes/picante-intro.pdf</a>     |
| Hmisc     | Descriptive statistics                   | <a href="http://math.furman.edu/~dcs/courses/math47/R/library/Hmisc/html/Overview.html">http://math.furman.edu/~dcs/courses/math47/R/library/Hmisc/html/Overview.html</a> |
| lme4      | Generalized linear mixed model           | <a href="https://github.com/lme4/lme4/">https://github.com/lme4/lme4/</a>                                                                                                 |

### Descriptive statistics of anthropometric measurements and clinical markers

Normality of distribution of the variables and residuals was visualized using a histogram and tested using the Shapiro-Wilks test. Missing values were imputed in an intention-to-treat analysis using the last observation carried forward method for the participants (n=2) who were randomized but did not receive intervention and for the participants that dropped out after the first intervention (n=2). A two-sided *P* value <0.05 was considered significant.

To investigate whether a VD could alter cardiovascular risk factor in IHD patients, the number of participants exhibiting guideline target values of clinical markers before and after intervention was calculated. Cut-off values of clinical markers routinely measured after a cardiac event were defined based on European Guidelines on cardiovascular disease

prevention in clinical practice: LDL-C <1.8 mmol/L, systolic blood pressure <130 mmHg or diastolic blood pressure <80 mmHg, and BMI <25 kg/m<sup>2</sup>.

### **Descriptive statistics of gut microbiota**

The graphic representations and statistical analyses of microbiota were performed using phyloseq v. 1.26 and ggplot2 v. 3. To investigate bacterial richness and phylogenetic diversity within samples, Faith's Phylogenetic Diversity and richness were calculated using Picante v. 1.7, and pairwise comparisons of the diets were implemented using a paired Wilcoxon test. To compare gut bacterial patterns of subjects consuming the same and different diets, Bray-Curtis dissimilarity, Weighted UniFrac, and Unweighted UniFrac were calculated using Vegan v. 2.5-4. Principal Coordinates Analysis (PcoA) and a permutation ANOVA (Adonis) was performed to assess differences in the microbiome associated with the diets. A differential abundance analysis of the OTUs was conducted on a subset of the OTUs existing in more than 20 samples using a pairwise paired Wilcoxon test.

### **Multilevel-predictive modelling for gut microbiota and plasma metabolome**

To identify microbial taxa and plasma metabolites discriminating the VD from the MD, random-forest-modeling-based multilevel data analyses (ML-RF) were applied using the R package 'MUVR' for the pair-wise comparison of the ZOTUs or metabolites in subjects consuming the VD and MD. A multilevel analysis deals with dependent data structures and has been successfully used to exploit the differences specific to diet in cross-over human nutrition intervention studies. In this ML-RF algorithm, random forest is applied on the within-subject variation matrix, i.e. the relative abundance of microbial genera observed in the two interventions as independent variables. The model is further incorporated into repeated double cross-validation with unbiased variable selection to reduce statistical overfitting,

improve prediction accuracy, and to identify the most informative features of treatments. Permutation analysis was performed to test overall model validity and degree of overfitting by calculating the cumulative probability of actual model misclassification within a t-distributed H0 population (n=100).

We applied generalized linear mixed modelling to compare VD vs. MD with respect to each of the selected discriminative ZOTUs and metabolites using the R package 'lme4.' Fixed factors included diet, sequence of intervention allocation, and baseline values as covariates and subject as random factor. This analysis was also applied on fecal concentrations of SCFAs. Within-treatment effects were similarly investigated with respect to relative abundance of microbial taxa at baseline and following intervention.

### **Baseline gut microbiota and plasma metabolites associated with response to diet with respect to clinical outcomes**

We investigated whether gut microbiota configuration or plasma metabolome at baseline was associated with the effects a VD on metabolic risk factors including oxidized LDL-C, LDL-C, TC, and BMI. Random forest modelling (R package 'MUVR') was used to identify a panel of baseline microbial genera and plasma metabolites that discriminated subjects who showed lower metabolic risk factors after VD than seen with MD (responders) from those in whom VD did not reduce improve metabolic risk factors compared to MD (non-responders).

### **Energy-adjusted meal plans**

The meal plan was personally adapted according to individual energy requirements and was energy- and macronutrient balanced. A research dietitian calculated the energy requirement for each subject by multiplying the Basal Metabolic Rate (BMR) with the Physical Activity Level (PAL). Henry's energy equation was used to calculate the BMR and the PAL values according



to Nordic Nutrition Recommendations based on data of physical activity stated by participants at the first study visit.

**Table S1. Details of ready-made meat meals.**

| Week | Day     | Meal   | Dish                               | Weight (g) | Energy (kcal) | Protein (g) | Fat (g) | Carbohydrates (g) | Fiber (g) | Saturated fatty acids (g) |
|------|---------|--------|------------------------------------|------------|---------------|-------------|---------|-------------------|-----------|---------------------------|
| 1.   | 1. Mon  | Lunch  | Dafgårds – Chicken Quiche          | 240        | 592.8         | 22.32       | 38.4    | 38.4              | 2.88      | 23.28                     |
|      |         | Dinner | Dafgårds - Meatballs & Red Peppers | 400        | 480           | 24          | 24      | 36                | 12        | 10.8                      |
|      |         | Total  |                                    |            | 1072.8        | 46.32       | 62.4    | 74.4              | 14.88     | 34.08                     |
|      | 2. Tue  | Lunch  | Dafgårds - Spaghetti Bolognese     | 400        | 480           | 24.4        | 16.4    | 64                | 5.6       | 7.6                       |
|      |         | Dinner | Dafgårds – Cheese and Ham Quiche   | 240        | 602.4         | 21.36       | 40.8    | 36                | 1.68      | 24                        |
|      |         | Total  |                                    |            | 1082.4        | 45.76       | 57.2    | 100               | 7.28      | 31.6                      |
|      | 3. Wed  | Lunch  | Dafgårds – Beef Stew               | 400        | 364           | 20          | 13.2    | 35.6              | 4.8       | 5.2                       |
|      |         | Dinner | Dafgårds – Kebab                   | 400        | 672           | 20.4        | 44      | 56                | 7.2       | 16                        |
|      |         | Total  |                                    |            | 1036          | 40.4        | 57.2    | 91.6              | 12        | 21.2                      |
|      | 4. Thur | Lunch  | Dafgårds – Greek Beef              | 380        | 456           | 18.24       | 23.94   | 41.8              | 6.84      | 9.5                       |
|      |         | Dinner | Dafgårds – Hash                    | 380        | 646           | 14.44       | 37.62   | 60.8              | 4.94      | 11.78                     |
|      |         | Total  |                                    |            | 1102          | 32.68       | 61.56   | 102.6             | 11.78     | 21.28                     |
|      | 5. Fri  | Lunch  | Dafgårds – Oven roasted chicken    | 420        | 504           | 30.66       | 13.02   | 63                | 4.2       | 5.88                      |
|      |         | Dinner | Dafgårds – Taco plate              | 390        | 565.5         | 19.11       | 26.52   | 58.5              | 3.9       | 12.09                     |
|      |         | Total  |                                    |            | 1069.5        | 49.77       | 39.54   | 121.5             | 8.1       | 17.97                     |
|      | 6. Sat  | Lunch  | Dafgårds – Fried Falun sausage     | 400        | 504           | 10.4        | 38.4    | 48                | 3.2       | 13.2                      |
|      |         | Dinner | Dafgårds – Fried Pork Loin         | 420        | 558.6         | 22.68       | 26.04   | 54.6              | 7.14      | 8.82                      |
|      |         | Total  |                                    |            | 1062.6        | 33.08       | 64.44   | 102.6             | 10.34     | 22.02                     |
|      | 7. Sun  | Lunch  | Dafgårds – Chicken Lasagna         | 420        | 504           | 29.4        | 13.86   | 67.2              | 2.52      | 8.4                       |
|      |         | Dinner | Dafgårds – Angus burger            | 380        | 558.6         | 17.1        | 36.86   | 38                | 4.56      | 14.82                     |
|      |         | Total  |                                    |            | 1062.6        | 46.5        | 50.72   | 105.2             | 7.08      | 23.22                     |
| 2.   | 8. Mon  | Lunch  | Dafgårds – Farmer burger           | 400        | 640           | 20.4        | 38      | 52                | 6.8       | 11.2                      |
|      |         | Dinner | Dafgårds - Spaghetti Bolognese     | 400        | 480           | 24.4        | 16.4    | 64                | 5.6       | 7.6                       |

|           |          |        |                                       |     |        |       |       |       |       |       |
|-----------|----------|--------|---------------------------------------|-----|--------|-------|-------|-------|-------|-------|
|           |          | Total  |                                       |     | 1120   | 44.8  | 54.4  | 116   | 12.4  | 18.8  |
|           | 9. Tue   | Lunch  | Dafgårds - Greek Beef                 | 380 | 456    | 18.24 | 23.94 | 41.8  | 6.84  | 9.5   |
|           |          | Dinner | Dafgårds – Chicken schnitzel          | 390 | 624    | 23.4  | 29.25 | 66.3  | 7.02  | 7.02  |
|           |          | Total  |                                       |     | 1080   | 41.64 | 53.19 | 108.1 | 13.86 | 16.52 |
|           | 10. Wed  | Lunch  | Dafgårds - Cheese and Ham Quiche      | 240 | 602.4  | 21.36 | 40.8  | 36    | 1.68  | 24    |
|           |          | Dinner | Dafgårds - Meatballs & Red Peppers    | 400 | 480    | 24    | 24    | 36    | 12    | 10.8  |
|           |          | Total  |                                       |     | 1082.4 | 45.36 | 64.8  | 72    | 13.68 | 34.8  |
|           | 11. Thur | Lunch  | Dafgårds - Fried Falun sausage        | 400 | 504    | 10.4  | 38.4  | 48    | 3.2   | 13.2  |
|           |          | Dinner | Dafgårds - Chicken Quiche             | 240 | 592.8  | 22.32 | 38.4  | 38.4  | 2.88  | 23.28 |
|           |          | Total  |                                       |     | 1096.8 | 32.72 | 76.8  | 86.4  | 6.08  | 36.48 |
|           | 12. Fri  | Lunch  | Dafgårds - Beef Stew                  | 400 | 364    | 20    | 13.2  | 35.6  | 4.8   | 5.2   |
|           |          | Dinner | Dafgårds – Italian style veal burgers | 400 | 660    | 24.4  | 32.4  | 64    | 6.4   | 9.2   |
|           |          | Total  |                                       |     | 1024   | 44.4  | 45.6  | 99.6  | 11.2  | 14.4  |
|           | 13. Sat  | Lunch  | Dafgårds - Oven roasted chicken       | 420 | 504    | 30.66 | 13.02 | 63    | 4.2   | 5.88  |
|           |          | Dinner | Dafgårds – Taco plate                 | 390 | 565.5  | 19.11 | 26.52 | 58.5  | 3.9   | 12.09 |
|           |          | Total  |                                       |     | 1069.5 | 49.77 | 39.54 | 121.5 | 8.1   | 17.97 |
|           | 14. Sun  | Lunch  | Dafgårds - Cabbage pudding            | 400 | 352    | 13.6  | 22.8  | 37.6  | 6     | 5.6   |
|           |          | Dinner | Dafgårds – Kebab                      | 400 | 672    | 20.4  | 44    | 56    | 7.2   | 16    |
|           |          | Total  |                                       |     | 1024   | 34    | 66.8  | 93.6  | 13.2  | 21.6  |
|           |          |        |                                       |     |        |       |       |       |       |       |
| <b>3.</b> | 15. Mon  | Lunch  | Dafgårds – Angus burger               | 380 | 558.6  | 17.1  | 36.86 | 38    | 4.56  | 14.82 |
|           |          | Dinner | Dafgårds - Chicken Lasagna            | 420 | 504    | 29.4  | 13.86 | 67.2  | 2.52  | 8.4   |
|           |          | Total  |                                       |     | 1062.6 | 46.5  | 50.72 | 105.2 | 7.08  | 23.22 |
|           | 16. Tue  | Lunch  | Dafgårds - Farmer burger              | 400 | 640    | 20.4  | 38    | 52    | 6.8   | 11.2  |
|           |          | Dinner | Dafgårds – Pork stew                  | 380 | 418    | 20.14 | 9.88  | 57    | 3.04  | 4.56  |
|           |          | Total  |                                       |     | 1058   | 40.54 | 47.88 | 109   | 9.84  | 15.76 |
|           | 17. Wed  | Lunch  | Dafgårds - Fried Pork Loin            | 420 | 558.6  | 22.68 | 26.04 | 54.6  | 7.14  | 8.82  |
|           |          | Dinner | Dafgårds - Oven roasted chicken       | 420 | 504    | 30.66 | 13.02 | 63    | 4.2   | 5.88  |
|           |          | Total  |                                       |     | 1062.6 | 53.34 | 39.06 | 117.6 | 11.34 | 14.7  |
|           | 18. Thur | Lunch  | Dafgårds - Cabbage pudding            | 400 | 352    | 13.6  | 22.8  | 37.6  | 6     | 5.6   |

|           |          |        |                                       |     |        |       |       |       |       |       |
|-----------|----------|--------|---------------------------------------|-----|--------|-------|-------|-------|-------|-------|
|           |          | Dinner | Dafgårds - Italian style veal burgers | 400 | 660    | 24.4  | 32.4  | 64    | 6.4   | 9.2   |
|           |          | Total  |                                       |     | 1012   | 38    | 55.2  | 101.6 | 12.4  | 14.8  |
|           | 19. Fri  | Lunch  | Dafgårds - Hash                       | 380 | 646    | 14.44 | 37.62 | 60.8  | 4.94  | 11.78 |
|           |          | Dinner | Dafgårds - Greek Beef                 | 380 | 456    | 18.24 | 23.94 | 41.8  | 6.84  | 9.5   |
|           |          | Total  |                                       |     | 1102   | 32.68 | 61.56 | 102.6 | 11.78 | 21.28 |
|           | 20. Sat  | Lunch  | Dafgårds – Kebab                      | 400 | 672    | 20.4  | 44    | 56    | 7.2   | 16    |
|           |          | Dinner | Dafgårds - Meatballs & Red Peppers    | 400 | 480    | 24    | 24    | 36    | 12    | 10.8  |
|           |          | Total  |                                       |     | 1152   | 44.4  | 68    | 92    | 19.2  | 26.8  |
|           | 21. Sun  | Lunch  | Dafgårds - Spaghetti Bolognese        | 400 | 480    | 24.4  | 16.4  | 64    | 5.6   | 7.6   |
|           |          | Dinner | Dafgårds - Chicken schnitzel          | 390 | 624    | 23.4  | 29.25 | 66.3  | 7.02  | 7.02  |
|           |          | Total  |                                       |     | 1104   | 47.8  | 45.65 | 130.3 | 12.62 | 14.62 |
|           |          |        |                                       |     |        |       |       |       |       |       |
| <b>4.</b> | 22. Mon  | Lunch  | Dafgårds - Chicken Quiche             | 240 | 592.8  | 22.32 | 38.4  | 38.4  | 2.88  | 23.28 |
|           |          | Dinner | Dafgårds - Angus burger               | 380 | 558.6  | 17.1  | 36.86 | 38    | 4.56  | 14.82 |
|           |          | Total  |                                       |     | 1151.4 | 39.4  | 75.26 | 76.4  | 7.44  | 38.1  |
|           | 23. Tue  | Lunch  | Dafgårds - Cabbage pudding            | 400 | 352    | 13.6  | 22.8  | 37.6  | 6     | 5.6   |
|           |          | Dinner | Dafgårds - Italian style veal burgers | 400 | 660    | 24.4  | 32.4  | 64    | 6.4   | 9.2   |
|           |          | Total  |                                       |     | 1012   | 38    | 55.2  | 101.6 | 12.4  | 14.8  |
|           | 24. Wed  | Lunch  | Dafgårds - Cheese and Ham Quiche      | 240 | 602.4  | 21.36 | 40.8  | 36    | 1.68  | 24    |
|           |          | Dinner | Dafgårds – Pork Stew                  | 380 | 418    | 20.14 | 9.88  | 57    | 3.04  | 4.56  |
|           |          | Total  |                                       |     | 1020.4 | 41.5  | 50.68 | 93    | 4.72  | 28.56 |
|           | 25. Thur | Lunch  | Dafgårds - Beef Stew                  | 400 | 364    | 20    | 13.2  | 35.6  | 4.8   | 5.2   |
|           |          | Dinner | Dafgårds - Hash                       | 380 | 646    | 14.44 | 37.62 | 60.8  | 4.94  | 11.78 |
|           |          | Total  |                                       |     | 1010   | 34.44 | 50.82 | 96.4  | 9.74  | 16.98 |
|           | 26. Fri  | Lunch  | Dafgårds - Fried Falun sausage        | 400 | 504    | 10.4  | 38.4  | 48    | 3.2   | 13.2  |
|           |          | Dinner | Dafgårds - Chicken schnitzel          | 390 | 624    | 23.4  | 29.25 | 66.3  | 7.02  | 7.02  |
|           |          | Total  |                                       |     | 1128   | 33.8  | 67.65 | 114.3 | 10.22 | 20.22 |
|           | 27. Sat  | Lunch  | Dafgårds - Farmer burger              | 400 | 640    | 20.4  | 38    | 52    | 6.8   | 11.2  |
|           |          | Dinner | Dafgårds - Chicken Lasagna            | 420 | 504    | 29.4  | 13.86 | 67.2  | 2.52  | 8.4   |
|           |          | Total  |                                       |     | 1144   | 49.8  | 51.86 | 119.2 | 9.32  | 19.6  |

|  |         |        |                            |     |        |       |       |        |       |       |
|--|---------|--------|----------------------------|-----|--------|-------|-------|--------|-------|-------|
|  | 28. Sun | Lunch  | Dafgårds - Taco plate      | 390 | 565.5  | 19.11 | 26.52 | 58.5   | 3.9   | 12.09 |
|  |         | Dinner | Dafgårds - Fried Pork Loin | 420 | 558.6  | 22.68 | 26.04 | 54.6   | 7.14  | 8.82  |
|  |         | Total  |                            |     | 1124.1 | 41.79 | 52.56 | 113.1  | 11.04 | 20.91 |
|  |         |        | Mean/meal                  |     | 1076   | 41.43 | 53.68 | 106.52 | 10.7  | 22.2  |

Kcal=kilocalorie

**Table S2. Details of ready-made vegetarian meals.**

| Week | Day     | Meal   | Dish                                                   | Weight (g) | Energy (kcal) | Protein (g) | Fat (g) | Carbohydrates (g) | Fiber (g) | Saturated fatty acids (g) |
|------|---------|--------|--------------------------------------------------------|------------|---------------|-------------|---------|-------------------|-----------|---------------------------|
| 1.   | 1. Mon  | Lunch  | Dafgårds - Pea/Sun-dried tomato steak with pasta       | 400        | 576           | 20.4        | 24      | 66                | 7.6       | 4                         |
|      |         | Dinner | Dafgårds - Cheese & Broccoli pie                       | 220        | 484           | 19.8        | 28.6    | 37.4              | 2.64      | 14.52                     |
|      |         | Total  |                                                        |            | 1060          | 40.2        | 52.6    | 103.4             | 10.24     | 18.52                     |
|      | 2. Tue  | Lunch  | Dafgårds - Asparagus pie                               | 240        | 561.6         | 19.2        | 38.4    | 36                | 2.64      | 23.04                     |
|      |         | Dinner | Dafgårds – Broccoli balls with quinoa and pepper sauce | 400        | 448           | 27.2        | 15.2    | 45.6              | 10.4      | 5.6                       |
|      |         | Total  |                                                        |            | 1009.6        | 46.4        | 53.6    | 81.6              | 13.04     | 28.64                     |
|      | 3. Wed  | Lunch  | Dafgårds – Vegetable pie with wholegrain crust         | 220        | 440           | 14.96       | 21.56   | 41.8              | 7.04      | 9.9                       |
|      |         | Dinner | Dafgårds - Falafel                                     | 400        | 560           | 20.4        | 25.2    | 64                | 11.2      | 3.6                       |
|      |         | Total  |                                                        |            | 1000          | 35.36       | 46.76   | 105.8             | 18.24     | 13.5                      |
|      | 4. Thur | Lunch  | Dafgårds - Pea/Sun-dried tomato steak with pasta       | 420        | 508.2         | 19.32       | 16.8    | 65.52             | 7.14      | 4.62                      |
|      |         | Dinner | Dafgårds - Indian lentil Stew                          | 400        | 516           | 23.2        | 20.4    | 56                | 11.6      | 11.2                      |
|      |         | Total  |                                                        |            | 1024.2        | 42.52       | 37.2    | 121.52            | 18.74     | 15.82                     |
|      | 5. Fri  | Lunch  | Dafgårds - Cheese & Broccoli pie                       | 220        | 484           | 19.8        | 28.6    | 37.4              | 2.64      | 14.52                     |
|      |         | Dinner | Dafgårds – Veggie burger                               | 400        | 516           | 19.2        | 26.4    | 48                | 9.6       | 4.4                       |
|      |         | Total  |                                                        |            | 1000          | 39          | 55      | 85.4              | 12.24     | 18.92                     |
|      | 6. Sat  | Lunch  | Dafgårds - Kale steak                                  | 380        | 338.2         | 13.68       | 6.84    | 53.2              | 9.12      | 0.76                      |
|      |         | Dinner | Dafgårds - Asparagus pie                               | 240        | 561.6         | 19.2        | 38.4    | 36                | 2.64      | 23.04                     |
|      |         | Total  |                                                        |            | 899.8         | 32.88       | 45.24   | 89.2              | 11.76     | 23.8                      |
|      | 7. Sun  | Lunch  | Dafgårds – Broccoli balls with quinoa and pepper sauce | 400        | 448           | 27.2        | 15.2    | 45.6              | 10.4      | 5.6                       |
|      |         | Dinner | Dafgårds - Mexican bean steak                          | 390        | 534.3         | 14.04       | 24.96   | 66.3              | 4.68      | 8.97                      |
|      |         | Total  |                                                        |            | 982.3         | 41.24       | 40.16   | 111.9             | 15.08     | 14.57                     |
| 2.   | 8. Mon  | Lunch  | Dafgårds - Cheese & Broccoli pie                       | 220        | 484           | 19.8        | 28.6    | 37.4              | 2.64      | 14.52                     |
|      |         | Dinner | Dafgårds - Falafel                                     | 400        | 560           | 20.4        | 25.2    | 64                | 11.2      | 3.6                       |
|      |         | Total  |                                                        |            | 1044          | 40.2        | 53.8    | 101.4             | 13.84     | 18.12                     |

|           |          |        |                                                        |     |        |       |       |        |       |       |
|-----------|----------|--------|--------------------------------------------------------|-----|--------|-------|-------|--------|-------|-------|
|           | 9. Tue   | Lunch  | Dafgårds – Vegetable pie with wholegrain crust         | 220 | 440    | 14.96 | 21.56 | 41.8   | 7.04  | 9.9   |
|           |          | Dinner | Dafgårds - Pea/Sun-dried tomato steak with pasta       | 400 | 576    | 20.4  | 24    | 66     | 7.6   | 4     |
|           |          | Total  |                                                        |     | 1016   | 35.36 | 45.56 | 107.8  | 14.64 | 13.9  |
|           | 10. Wed  | Lunch  | Dafgårds – Broccoli balls with quinoa and pepper sauce | 400 | 448    | 27.2  | 15.2  | 45.6   | 10.4  | 5.6   |
|           |          | Dinner | Dafgårds - Mexican bean steak                          | 390 | 534.3  | 14.04 | 24.96 | 66.3   | 4.68  | 8.97  |
|           |          | Total  |                                                        |     | 982.3  | 41.24 | 40.16 | 111.9  | 15.08 | 14.57 |
|           | 11. Thur | Lunch  | Dafgårds - Indian lentil Stew                          | 400 | 516    | 23.2  | 20.4  | 56     | 11.6  | 11.2  |
|           |          | Dinner | Dafgårds – Veggie burger                               | 400 | 516    | 19.2  | 26.4  | 48     | 9.6   | 4.4   |
|           |          | Total  |                                                        |     | 1032   | 42.4  | 46.8  | 104    | 21.2  | 15.6  |
|           | 12. Fri  | Lunch  | Dafgårds - Kale steak                                  | 380 | 338.2  | 13.68 | 6.84  | 53.2   | 9.12  | 0.76  |
|           |          | Dinner | Dafgårds - Asparagus pie                               | 240 | 561.6  | 19.2  | 38.4  | 36     | 2.64  | 23.04 |
|           |          | Total  |                                                        |     | 899.8  | 32.88 | 45.24 | 89.2   | 11.76 | 23.8  |
|           | 13. Sat  | Lunch  | Dafgårds – Sun-dried tomato/pea steak with vegetables  | 420 | 508.2  | 19.32 | 16.8  | 65.52  | 7.14  | 4.62  |
|           |          | Dinner | Dafgårds - Mexican bean steak                          | 390 | 534.3  | 14.04 | 24.96 | 66.3   | 4.68  | 8.97  |
|           |          | Total  |                                                        |     | 1042.5 | 33.36 | 41.76 | 131.82 | 11.82 | 13.59 |
|           | 14. Sun  | Lunch  | Dafgårds - Falafel                                     | 400 | 560    | 20.4  | 25.2  | 64     | 11.2  | 3.6   |
|           |          | Dinner | Dafgårds - Indian lentil Stew                          | 400 | 516    | 23.2  | 20.4  | 56     | 11.6  | 11.2  |
|           |          | Total  |                                                        |     | 1076   | 43.6  | 45.6  | 120    | 22.8  | 14.8  |
| <b>3.</b> | 15. Mon  | Lunch  | Dafgårds - Pea/Sun-dried tomato steak with pasta       | 400 | 576    | 20.4  | 24    | 66     | 7.6   | 4     |
|           |          | Dinner | Dafgårds - Kale steak                                  | 380 | 338.2  | 13.68 | 6.84  | 53.2   | 9.12  | 0.76  |
|           |          | Total  |                                                        |     | 914.2  | 34.08 | 30.84 | 119.2  | 16.72 | 4.76  |
|           | 16. Tue  | Lunch  | Dafgårds - Asparagus pie                               | 240 | 561.6  | 19.2  | 38.4  | 36     | 2.64  | 23.04 |
|           |          | Dinner | Dafgårds – Broccoli balls with quinoa and pepper sauce | 400 | 448    | 27.2  | 15.2  | 45.6   | 10.4  | 5.6   |
|           |          | Total  |                                                        |     | 1009.6 | 46.4  | 53.6  | 81.6   | 13.04 | 28.64 |
|           | 17. Wed  | Lunch  | Dafgårds - Sun-dried tomato/pea steak with vegetables  | 420 | 508.2  | 19.32 | 16.8  | 65.52  | 7.14  | 4.62  |
|           |          | Dinner | Dafgårds - Falafel                                     | 400 | 560    | 20.4  | 25.2  | 64     | 11.2  | 3.6   |

|    |          |        |                                                        |     |        |       |       |        |       |       |
|----|----------|--------|--------------------------------------------------------|-----|--------|-------|-------|--------|-------|-------|
|    |          | Total  |                                                        |     | 1068.2 | 39.72 | 42    | 129.52 | 18.34 | 8.22  |
|    | 18. Thur | Lunch  | Dafgårds – Veggie burger                               | 400 | 516    | 19.2  | 26.4  | 48     | 9.6   | 4.4   |
|    |          | Dinner | Dafgårds - Cheese & Broccoli pie                       | 220 | 484    | 19.8  | 28.6  | 37.4   | 2.64  | 14.52 |
|    |          | Total  |                                                        |     | 1000   | 39    | 55    | 85.4   | 12.24 | 18.92 |
|    | 19. Fri  | Lunch  | Dafgårds - Asparagus pie                               | 240 | 561.6  | 19.2  | 38.4  | 36     | 2.64  | 23.04 |
|    |          | Dinner | Dafgårds - Indian lentil Stew                          | 400 | 516    | 23.2  | 20.4  | 56     | 11.6  | 11.2  |
|    |          | Total  |                                                        |     | 1077.6 | 42.4  | 58.8  | 92     | 14.24 | 34.24 |
|    | 20. Sat  | Lunch  | Dafgårds - Kale steak                                  | 380 | 338.2  | 13.68 | 6.84  | 53.2   | 9.12  | 0.76  |
|    |          | Dinner | Dafgårds - Pea/Sun-dried tomato steak with pasta       | 400 | 576    | 20.4  | 24    | 66     | 7.6   | 4     |
|    |          | Total  |                                                        |     | 914.2  | 34.08 | 30.84 | 119.2  | 16.72 | 4.76  |
|    | 21. Sun  | Lunch  | Dafgårds – Vegetable pie with wholegrain crust         | 220 | 440    | 14.96 | 21.56 | 41.8   | 7.04  | 9.9   |
|    |          | Dinner | Dafgårds - Mexican bean steak                          | 390 | 534.3  | 14.04 | 24.96 | 66.3   | 4.68  | 8.97  |
|    |          | Total  |                                                        |     | 974.3  | 29    | 46.52 | 108.1  | 11.72 | 18.87 |
| 4. | 22. Mon  | Lunch  | Dafgårds - Veggieburger                                | 400 | 516    | 19.2  | 26.4  | 48     | 9.6   | 4.4   |
|    |          | Dinner | Dafgårds - Sun-dried tomato/pea steak with vegetables  | 420 | 508.2  | 19.32 | 16.8  | 65.52  | 7.14  | 4.62  |
|    |          | Total  |                                                        |     | 1024.2 | 38.52 | 43.2  | 113.52 | 16.74 | 9.02  |
|    | 23. Tus  | Lunch  | Dafgårds - Falafel                                     | 400 | 560    | 20.4  | 25.2  | 64     | 11.2  | 3.6   |
|    |          | Dinner | Dafgårds – Vegetable pie with wholegrain crust         | 220 | 440    | 14.96 | 21.56 | 41.8   | 7.04  | 9.9   |
|    |          | Total  |                                                        |     | 1000   | 35.36 | 46.76 | 105.8  | 18.24 | 13.5  |
|    | 24. Wed  | Lunch  | Dafgårds - Pea/Sun-dried tomato steak with pasta       | 400 | 576    | 20.4  | 24    | 66     | 7.6   | 4     |
|    |          | Dinner | Dafgårds - Kale steak                                  | 380 | 338.2  | 13.68 | 6.84  | 53.2   | 9.12  | 0.76  |
|    |          | Total  |                                                        |     | 914.2  | 34.08 | 30.84 | 119.2  | 16.72 | 4.76  |
|    | 25. Thur | Lunch  | Dafgårds – Broccoli balls with quinoa and pepper sauce | 400 | 448    | 27.2  | 15.2  | 45.6   | 10.4  | 5.6   |
|    |          | Dinner | Dafgårds - Asparagus pie                               | 240 | 561.6  | 19.2  | 38.4  | 36     | 2.64  | 23.04 |
|    |          | Total  |                                                        |     | 1009.6 | 46.4  | 53.6  | 81.6   | 13.04 | 28.64 |
|    | 26. Fri  | Lunch  | Dafgårds - Cheese & Broccoli pie                       | 220 | 484    | 19.8  | 28.6  | 37.4   | 2.64  | 14.52 |



|  |         |        |                                                       |     |        |       |       |        |       |       |
|--|---------|--------|-------------------------------------------------------|-----|--------|-------|-------|--------|-------|-------|
|  |         | Dinner | Dafgårds – Veggie burger                              | 400 | 516    | 19.2  | 26.4  | 48     | 9.6   | 4.4   |
|  |         | Total  |                                                       |     | 1000   | 39    | 55    | 85.4   | 12.24 | 18.92 |
|  | 27. Sat | Lunch  | Dafgårds - Sun-dried tomato/pea steak with vegetables | 420 | 508.2  | 19.32 | 16.8  | 65.52  | 7.14  | 4.62  |
|  |         | Dinner | Dafgårds - Indian lentil Stew                         | 400 | 516    | 23.2  | 20.4  | 56     | 11.6  | 11.2  |
|  |         | Total  |                                                       |     | 1024.2 | 42.52 | 37.2  | 121.52 | 18.74 | 15.82 |
|  | 28. Sun | Lunch  | Dafgårds – Vegetable pie with wholegrain crust        | 220 | 440    | 14.96 | 21.56 | 41.8   | 7.04  | 9.9   |
|  |         | Dinner | Dafgårds - Mexican bean steak                         | 390 | 534.3  | 14.04 | 24.96 | 66.3   | 4.68  | 8.97  |
|  |         | Total  |                                                       |     | 974.3  | 29    | 46.52 | 108.1  | 11.72 | 18.87 |
|  |         |        | Mean/meal                                             |     | 999    | 38.5  | 45.7  | 104.8  | 15    | 17    |

Kcal=kilocalorie

**Table S3. Dietary intake before and during the two intervention periods, VD (vegetarian diet) and MD (meat diet), based on 3-day weighed food records+.**

|                   | Pre VD                |                         | VD                    |                         | Pre MD                |                         | MD                    |                         |
|-------------------|-----------------------|-------------------------|-----------------------|-------------------------|-----------------------|-------------------------|-----------------------|-------------------------|
|                   | Pooled data<br>(n=31) | Original data<br>(n=20) | Pooled data<br>(n=31) | Original data<br>(n=18) | Pooled data<br>(n=31) | Original data<br>(n=18) | Pooled data<br>(n=31) | Original data<br>(n=20) |
|                   | mean                  | median [IQR]            |
| Energy (kcal)     | 2147                  | 2097<br>[1929-2360]     | 2168                  | 2079<br>[1797-2515]     | 2373                  | 2266<br>[2104-2630]     | 2267                  | 2286<br>[2042-2567]     |
| Protein (g)       | 85*                   | 86<br>[72-101]          | 78*                   | 79<br>[65-86]           | 92**                  | 92 ***<br>[79-99]       | 80**                  | 81***<br>[73-88]        |
| Carbohydrates (g) | 229                   | 216<br>[192-294]        | 247                   | 249<br>[197-294]        | 259                   | 253<br>[201-285]        | 266                   | 251<br>[209-293]        |
| Fat (g)           | 89                    | 89<br>[73-101]          | 89                    | 83<br>[68-102]          | 96                    | 92<br>[86-107]          | 90                    | 85<br>[71-102]          |
| Saturated fat (g) | 36                    | 35<br>[28-44]           | 36                    | 35<br>[27-43]           | 39                    | 38<br>[30-49]           | 34                    | 33<br>[29-41]           |
| Fiber (g)         | 24                    | 24<br>[19-28]           | 31****                | 30<br>[26-37]           | 26                    | 27<br>[22-31]           | 28****                | 29<br>[25-33]           |

◆ Pre VD/MD: Reported dietary intake before VD or MD intervention period (at baseline or end of washout) ◆ VD/MD: Reported dietary intake of VD/MD ◆  
 ◆ IQR: Interquartile range ◆ Pooled data: Multiple imputation was used for missing values ◆ Wilcoxon Rank Sum test was used for all comparisons ◆  $p < 0.05$  was considered significant ◆

\* Borderline significant difference in pooled data (Imputation number/p-values: 1/0.006, 2/0.04, 3/0.01, 4/0.03, 5/0.07) of protein intake of Pre VD and VD

\*\* Significant difference in pooled data (Imputation number/p-values: 1/P=0.000, 2/P=0.000, 3/P=0.000, 4/P=0.001, 5/P=0.000) of protein intake between Pre MD and MD. \*\*\* Significant difference in original data ( $p=0.046$ ) of protein intake between Pre MD and MD.

\*\*\*\* Significant difference in pooled data (Imputation number/p-values: 1/P=0.008, 2/P=0.02, 3/P=0.02, 4/P=0.002, 5/P=0.01) between fiber intake of VD and MD.

+three-day weighed food information was collected four times during the study: during the week before baseline, the last week of VD, the last week of the washout period, and the last week of MD. 58% (18/31) completed all four registrations. Food records with daily total energy intake:basal metabolic rate  $< 1$  were considered as underreported and excluded from the analysis.  $n$  of original data refers to the number subjects completing the food record and that remain following exclusion.

**Table S4. Adherence to the intervention diets.**

|                            | <i>VD</i>             |                         | <i>MD</i>             |                         |
|----------------------------|-----------------------|-------------------------|-----------------------|-------------------------|
|                            | Pooled data<br>(n=31) | Original data<br>(n=28) | Pooled data<br>(n=31) | Original data<br>(n=27) |
|                            | mean %                | median % [IQR]          | mean %                | median % [IQR]          |
| <i>Breakfast</i>           | 94                    | 100<br>[96-100]         | 92                    | 100<br>[96-100]         |
| <i>Lunch</i>               | 97                    | 100<br>[96-100]         | 98                    | 100<br>[96-100]         |
| <i>Dinner</i>              | 94                    | 98<br>[93-100]          | 96                    | 96<br>[95-100]          |
| <i>Side dish</i>           | 79                    | 92<br>[73-99]           | 68                    | 89<br>[30-100]          |
| <i>Snack (light meals)</i> | 67*                   | 76<br>[43-94]           | 57*                   | 50<br>[40-94]           |
| <i>Overall adherence</i>   | 86**                  | 88<br>[83-98]           | 83**                  | 88<br>[77-96]           |

◆ Pooled data: Multiple imputation was used for missing values ◆ Wilcoxon signed rank sum test was used for analysis ◆

\*Significant difference in overall adherence of the pooled data (Imputation number/P-values: 1/P=0.01, 2/P=0.02, 3/P=0.01, 4/P=0.02, 5/P=0.01) in snacks of *VD* and *MD*.

\*\*Borderline significant difference in overall adherence (Imputation number/p-values: 1/P=0.05, 2/P=0.03, 3/P=0.03, 4/P=0.04, 5/P=0.1) between *VD* and *MD*.

*VD* (vegetarian diet) and *MD* (meat diet), in mean percentage (%) adherence the prescribed diet, calculated from the self-reported study diaries. To assess the adherence to the intervention diets, the participants were asked to conduct a compliance diary every day during the two intervention periods.

**Table S5. Participants exhibiting guideline target values of clinical markers/dietary intervention.**

|                                   | Pre VD (n=31) | Post VD (n=31) | Pre MD (n=31) | Post MD (n=31) | Post VD vs. Post MD |
|-----------------------------------|---------------|----------------|---------------|----------------|---------------------|
| LDL-C <1.8 mmol/L, n (%)          | 22 (71.0)     | 27 (87.1)      | 22 (71.0)     | 24 (77.4)      | -3 (9.7)            |
| BMI <25 kg/m <sup>2</sup> , n (%) | 4 (12.9)      | 6 (19.4)       | 5 (16.1)      | 4 (12.9)       | -2 (6.5)            |
| Diastolic Bp <80 mmHg, n (%)      | 9 (29.0)      | 8 (25.8)       | 7 (22.6)      | 6 (19.4)       | -2 (6.5)            |
| Systolic Bp <130 mmHg, n (%)      | 11 (35.5)     | 14 (45.2)      | 9 (29.0)      | 12 (38.7)      | -2 (6.5)            |

BMI, Body-mass index; Bp, Blood pressure; LDL-C, Low-density lipoprotein cholesterol; MD, meat diet; VD, vegetarian diet.

**Table S6. Assessed quality of life relative to dietary intervention.**

|                           | Pre VD<br>n=31             | Post VD<br>n=31        | Pre MD<br>n=31         | Post MD<br>n=31        | Post VD vs.<br>Post MD |
|---------------------------|----------------------------|------------------------|------------------------|------------------------|------------------------|
| Eq5d, VAS                 | 81.38<br>(77.25–<br>85.53) | 80.84<br>(76.21–85.47) | 80.58<br>(76.63–84.53) | 80.45<br>(75.55–85.35) | -0.37<br>(-3.74–2.99)  |
| <b>Mobility</b>           |                            |                        |                        |                        |                        |
| -No problems, n (%)       | 27 (87)                    | 27 (87)                | 28 (90)                | 27 (87)                | 0 (0)                  |
| -Some problems, n (%)     | 4 (13)                     | 4 (13)                 | 3 (10)                 | 4 (13)                 | 0 (0)                  |
| -Extreme problems, n (%)  | 0 (0)                      | 0(0)                   | 0 (0)                  | 0 (0)                  | 0 (0)                  |
| <b>Self-care</b>          |                            |                        |                        |                        |                        |
| -No problems, n (%)       | 31 (100)                   | 31(100)                | 31 (100)               | 31(100)                | 0 (0)                  |
| -Some problems, n (%)     | 0 (0)                      | 0 (0)                  | 0 (0)                  | 0 (0)                  | 0 (0)                  |
| -Extreme problems, n (%)  | 0 (0)                      | 0 (0)                  | 0 (0)                  | 0 (0)                  | 0 (0)                  |
| <b>Usual-activities</b>   |                            |                        |                        |                        |                        |
| -No problems, n (%)       | 30 (97)                    | 31 (100)               | 31(100)                | 31(100)                | 0 (0)                  |
| -Some problems, n (%)     | 1 (3)                      | 0 (0)                  | 0 (0)                  | 0 (0)                  | 0 (0)                  |
| -Extreme problems, n (%)  | 0 (0)                      | 0 (0)                  | 0 (0)                  | 0 (0)                  | 0 (0)                  |
| <b>Pain/discomfort</b>    |                            |                        |                        |                        |                        |
| -No problems, n (%)       | 17 (55)                    | 17 (55)                | 16 (52)                | 17 (55)                | 0 (0)                  |
| -Some problems, n (%)     | 14 (45)                    | 14 (45)                | 14 (45)                | 14 (45)                | 0 (0)                  |
| -Extreme problems, n (%)  | 0 (0)                      | 0 (0)                  | 1 (3)                  | 0 (0)                  | 0 (0)                  |
| <b>Anxiety/depression</b> |                            |                        |                        |                        |                        |
| -No problems, n (%)       | 24 (77)                    | 26 (84)                | 24 (77)                | 25 (81)                | 1 (3.2)                |
| -Some problems, n (%)     | 7 (23)                     | 5 (16)                 | 7 (23)                 | 6 (19)                 | -1 (-3.2)              |
| -Extreme problems, n (%)  | 0 (0)                      | 0 (0)                  | 0 (0)                  | 0 (0)                  | 0 (0)                  |

Eq5d, the EuroQoL five-dimension questionnaire; VAS, visual analog scale.

**Table S7. Effect of dietary intervention on clinical parameters according to on-treatment analysis.**

|                              | Pre VD                 | Post VD                   | Pre MD                 | Post MD                 | Post VD vs Post MD#      | p#    |
|------------------------------|------------------------|---------------------------|------------------------|-------------------------|--------------------------|-------|
| Oxidized LDL-C, U/L          | 41.7<br>(37.1-46.0)    | 37.0<br>(33.6-40.3)**     | 42.1<br>(37.7-46.6)    | 40.2<br>(35.8-44.6)     | -3.16<br>(-5.53--0.78)   | 0.02  |
| TC, mg/dL                    | 133.4<br>(123.0-143.6) | 121.4<br>(113.7-129.2)*** | 135.1<br>(127.6-145.0) | 127.6<br>(117.9-136.9)* | -6.2<br>(-10.1--1.9)     | 0.005 |
| LDL-C, mg/dL                 | 61.9<br>(54.5-68.1)    | 53.4<br>(48.3-58.8)***    | 63.8<br>(57.6-70.4)    | 58.4<br>(51.8-65.0)*    | -5.0<br>(-8.5--1.2)      | 0.008 |
| HDL-C, mg/dL                 | 46.4<br>[41.8-51.8]    | 43.3<br>[38.7-48.3]**     | 48.3<br>[43.7-53.4]    | 44.9<br>[39.8-50.3]     | -1.2<br>[-3.1-0.4]       | 0.2   |
| TG, mg/dL                    | 85.0<br>[73.5-96.5]    | 90.3<br>[80.6-100.9]      | 85.0<br>[73.5-97.4]    | 85.0<br>[74.4-96.5]     | 5.3<br>[-2.7-13.3]       | 0.2   |
| Apo B, g/L                   | 0.64<br>(0.59-0.70)    | 0.58<br>(0.53-0.62)***    | 0.66<br>(0.61-0.71)    | 0.60<br>(0.55-0.65)**   | -0.026<br>(-0.05--0.001) | 0.04  |
| Apo A1, g/L                  | 1.40<br>(1.33-1.47)    | 1.39<br>(1.31-1.46)       | 1.42<br>(1.35-1.49)    | 1.41<br>(1.34-1.49)     | -0.023<br>(-0.058-0.012) | 0.2   |
| Apo B/ApoA1 ratio            | 0.45<br>[0.42-0.49]    | 0.41<br>[0.38-0.45]**     | 0.46<br>[0.42-0.5]     | 0.42<br>[0.38-0.46]***  | -0.025<br>[-0.07-0.03]   | 0.3   |
| HbA <sub>1c</sub> , mmol/mol | 38.0<br>[36.9-39.2]    | 38.2<br>[36.9-39.6]       | 38.1<br>[36.9-39.3]    | 38.2<br>[37.0-39.5]     | 0.0001<br>[-0.022-0.022] | 0.9   |
| Weight, kg                   | 82.6<br>(78.2-86.9)    | 82.1<br>(77.7-86.6)       | 83.2<br>(78.7-87.7)    | 82.8<br>(78.2-87.3)     | -0.7<br>(-1.24--0.15)    | 0.01  |
| Hs-crp, mg/L                 | 0.69<br>[0.48-0.99]    | 0.69<br>[0.45-1.05]       | 0.77<br>[0.57-1.04]    | 0.76<br>[0.51-1.14]     | -0.10<br>[-0.48-0.27]    | 0.4   |
| Systolic Bp, mmHg            | 134<br>(127-141)       | 131<br>(125-137)          | 138<br>(130-145)       | 134<br>(127-141)        | -3.1<br>(-6.5-0.3)       | 0.07  |
| Diastolic Bp, mmHg           | 85<br>(81-89)          | 85<br>(82-88)             | 87<br>(83-90)          | 87<br>(83-91)           | -1.5<br>(-4.6-1.6)       | 0.3   |
| Hr, bpm                      | 62.5<br>[59.4-65.7]    | 62.6<br>[60.1-65.2]       | 63.8<br>[60.4-67.5]    | 63.6<br>[60.0-67.4]     | -0.01<br>[-0.05-0.03]    | 0.5   |

Data are presented as mean (95% C.I) or as geometric mean [95 % C.I]. Within-group change p-value was calculated with paired t-test. \*P<0.05, \*\*P<0.01, \*\*\*P<0.001.

#Differences in clinical parameters between vegetarian diet (VD) and meat diet (MD) were examined using linear mixed-effects models adjusted for sequence of randomisation and period of interventions. Apo: Apolipoprotein, Bp; Blood pressure, Bpm; beats per minute, HbA<sub>1c</sub>; Glycated haemoglobin; HDL-C; High-density lipoprotein cholesterol, Hr; Heart rate, Hs-CRP; High-sensitive c-reactive protein, Kg; Kilograms, LDL-C; Low-density lipoprotein cholesterol, mmHg; millimetres of mercury, MD: meat diet; TC; Total cholesterol, TG; Triglycerides; VD: vegetarian diet. To convert cholesterol markers to millimoles per liter, multiply by 0.02586. To convert triglycerides to millimoles per liter, multiply by 0.01.

**Table S8. Gut bacteria genera post-dietary intervention.**

| Phylum                 | Class                      | Family                        | Genus                               | Post-MD*      | Post-VD*      | SEM           | p           |
|------------------------|----------------------------|-------------------------------|-------------------------------------|---------------|---------------|---------------|-------------|
| <b>Firmicutes</b>      | <b>Clostridia</b>          | <b>Lachnospiraceae</b>        | <b>Shuttleworthia #</b>             | <b>0.56</b>   | <b>7.02</b>   | <b>1.24</b>   | <b>0.00</b> |
| <b>Firmicutes</b>      | <b>Clostridia</b>          | <b>Ruminococcaceae</b>        | <b>DTU089#</b>                      | <b>15.41</b>  | <b>7.17</b>   | <b>1.99</b>   | <b>0.00</b> |
| <b>Firmicutes</b>      | <b>Clostridia</b>          | <b>Ruminococcaceae</b>        | <b>Ruminiclostridium_5#</b>         | <b>390.12</b> | <b>200.71</b> | <b>38.41</b>  | <b>0.00</b> |
| <b>Firmicutes</b>      | <b>Clostridia</b>          | <b>Clostridiaceae_1</b>       | <b>Clostridium_sensu_stricto_1#</b> | <b>567.77</b> | <b>353.04</b> | <b>106.86</b> | <b>0.00</b> |
| <b>Firmicutes</b>      | <b>Clostridia</b>          | <b>Ruminococcaceae</b>        | <b>Negativibacillus#</b>            | <b>24.94</b>  | <b>13.05</b>  | <b>3.85</b>   | <b>0.00</b> |
| <b>Firmicutes</b>      | <b>Clostridia</b>          | <b>Ruminococcaceae</b>        | <b>Anaerofilum#</b>                 | <b>4.33</b>   | <b>2.01</b>   | <b>0.68</b>   | <b>0.01</b> |
| <b>Proteobacteria</b>  | <b>Gammaproteobacteria</b> | <b>Burkholderiaceae</b>       | <b>Parasutterella#</b>              | <b>46.45</b>  | <b>33.73</b>  | <b>4.43</b>   | <b>0.03</b> |
| <b>Firmicutes</b>      | <b>Clostridia</b>          | <b>Ruminococcaceae</b>        | <b>Oscillospira#</b>                | <b>16.38</b>  | <b>11.52</b>  | <b>2.38</b>   | <b>0.04</b> |
| <b>Firmicutes</b>      | <b>Clostridia</b>          | <b>Lachnospiraceae</b>        | <b>Fusicatenibacter#</b>            | <b>743.99</b> | <b>898.35</b> | <b>90.56</b>  | <b>0.04</b> |
| <b>Cyanobacteria</b>   | <b>Melainabacteria</b>     | <b>NA</b>                     | <b>NA#</b>                          | <b>19.44</b>  | <b>8.29</b>   | <b>4.43</b>   | <b>0.04</b> |
| <b>Bacteroidetes</b>   | <b>Bacteroidia</b>         | <b>Tannerellaceae</b>         | <b>Parabacteroides#</b>             | <b>309.61</b> | <b>216.68</b> | <b>33.51</b>  | <b>0.05</b> |
| <b>Verrucomicrobia</b> | <b>Verrucomicrobiae</b>    | <b>Akkermansiaceae</b>        | <b>Akkermansia#</b>                 | <b>426.26</b> | <b>811.53</b> | <b>203.63</b> | <b>0.04</b> |
| Firmicutes             | Clostridia                 | Lachnospiraceae               | Lachnospiraceae_FCS020_group#       | 98.89         | 85.22         | 6.00          | 0.06        |
| Actinobacteria         | Coriobacteriia             | Eggerthellaceae               | Adlercreutzia#                      | 25.77         | 17.66         | 2.90          | 0.06        |
| Firmicutes             | Erysipelotrichia           | Erysipelotrichaceae           | NA#                                 | 13.85         | 7.14          | 3.82          | 0.06        |
| Firmicutes             | Clostridia                 | Clostridiales_vadinBB60_group | NA#                                 | 25.56         | 16.79         | 4.71          | 0.07        |
| Bacteroidetes          | Bacteroidia                | NA                            | NA#                                 | 0.98          | 2.15          | 0.43          | 0.07        |
| Actinobacteria         | Coriobacteriia             | Eggerthellaceae               | DNF00809#                           | 4.53          | 7.36          | 1.11          | 0.08        |
| Tenericutes            | Mollicutes                 | NA                            | NA#                                 | 15.37         | 9.09          | 3.36          | 0.08        |
| Firmicutes             | Clostridia                 | Ruminococcaceae               | Butyricoccus#                       | 179.12        | 220.22        | 27.20         | 0.08        |
| Actinobacteria         | Coriobacteriia             | Eggerthellaceae               | Senegalimassilia#                   | 39.67         | 29.54         | 5.61          | 0.08        |
| Tenericutes            | Mollicutes                 | NA                            | NA#                                 | 23.83         | 60.39         | 16.18         | 0.08        |
| Euryarchaeota          | Methanobacteria            | Methanobacteriaceae           | Methanobrevibacter#                 | 110.14        | 162.22        | 34.79         | 0.09        |
| Firmicutes             | Clostridia                 | Ruminococcaceae               | Ruminococcaceae_UCG-005#            | 834.72        | 677.37        | 98.87         | 0.09        |
| Firmicutes             | Clostridia                 | Peptostreptococcaceae         | Intestinibacter#                    | 338.76        | 239.26        | 49.91         | 0.09        |
| Firmicutes             | Clostridia                 | Lachnospiraceae               | Lachnospiraceae_UCG-010#            | 24.47         | 20.36         | 2.63          | 0.10        |



|                |                     |                       |                                |         |         |        |      |
|----------------|---------------------|-----------------------|--------------------------------|---------|---------|--------|------|
| Firmicutes     | Negativicutes       | Veillonellaceae       | Dialister#                     | 618.60  | 468.50  | 82.27  | 0.10 |
| Firmicutes     | Bacilli             | Lactobacillaceae      | Lactobacillus#                 | 33.00   | 93.27   | 29.36  | 0.10 |
| Firmicutes     | Clostridia          | Ruminococcaceae       | Ruminococcaceae_UCG-007#       | 6.70    | 5.09    | 1.11   | 0.14 |
| Firmicutes     | Clostridia          | Lachnospiraceae       | Marvinbryantia#                | 121.84  | 185.73  | 33.03  | 0.15 |
| Firmicutes     | Clostridia          | Ruminococcaceae       | Angelakisella#                 | 12.38   | 9.88    | 1.69   | 0.17 |
| Firmicutes     | Clostridia          | Family_XIII           | Family_XIII_UCG-001#           | 20.74   | 15.66   | 2.97   | 0.17 |
| Bacteroidetes  | Bacteroidia         | Rikenellaceae         | Alistipes#                     | 566.34  | 484.11  | 58.10  | 0.20 |
| Firmicutes     | Clostridia          | Ruminococcaceae       | Ruminococcaceae_NK4A214_group# | 301.27  | 382.87  | 66.64  | 0.27 |
| Proteobacteria | Gammaproteobacteria | Enterobacteriaceae    | Escherichia/Shigella#          | 125.64  | 292.68  | 106.65 | 0.28 |
| Actinobacteria | Coriobacteriia      | Eggerthellaceae       | Eggerthella#                   | 7.20    | 1.60    | 4.47   | 0.29 |
| Firmicutes     | Clostridia          | Lachnospiraceae       | Butyrivibrio#                  | 321.91  | 107.98  | 140.78 | 0.29 |
| Firmicutes     | Clostridia          | Ruminococcaceae       | Hydrogenoanaerobacterium#      | 3.32    | 3.89    | 1.14   | 0.39 |
| Firmicutes     | Clostridia          | Lachnospiraceae       | UC5-1-2E3#                     | 8.12    | 5.97    | 2.13   | 0.40 |
| Firmicutes     | Clostridia          | Lachnospiraceae       | GCA-900066755#                 | 1.89    | 1.56    | 0.51   | 0.57 |
| Bacteroidetes  | Bacteroidia         | Marinifilaceae        | Butyricimonas#                 | 24.58   | 26.22   | 5.23   | 0.76 |
| Firmicutes     | Clostridia          | Ruminococcaceae       | NA#                            | 776.35  | 746.43  | 79.88  | 0.78 |
| Firmicutes     | Clostridia          | Lachnospiraceae       | Coprococcus_1#                 | 181.22  | 188.32  | 23.13  | 0.79 |
| Firmicutes     | Clostridia          | Family_XIII           | NA#                            | 2.23    | 2.04    | 0.62   | 0.83 |
| Firmicutes     | Clostridia          | Lachnospiraceae       | Roseburia#                     | 480.41  | 499.21  | 78.37  | 0.87 |
| Firmicutes     | Clostridia          | Ruminococcaceae       | Ruminococcus_2#                | 1233.61 | 1217.96 | 142.38 | 0.89 |
| Firmicutes     | Clostridia          | Lachnospiraceae       | Lachnospira                    | 546.75  | 800.77  | 108.00 | 0.11 |
| Firmicutes     | Clostridia          | Ruminococcaceae       | Ruminococcaceae_UCG-013        | 121.20  | 167.57  | 25.67  | 0.11 |
| Firmicutes     | Clostridia          | Lachnospiraceae       | Tyzzereella                    | 2.83    | 1.71    | 0.65   | 0.13 |
| Actinobacteria | Coriobacteriia      | NA                    | NA                             | 16.33   | 12.24   | 3.04   | 0.13 |
| Firmicutes     | Clostridia          | Peptostreptococcaceae | Romboutsia                     | 318.28  | 200.60  | 53.86  | 0.14 |
| Firmicutes     | Clostridia          | Ruminococcaceae       | Ruminococcaceae_UCG-009        | 7.12    | 4.67    | 1.50   | 0.14 |
| Bacteroidetes  | Bacteroidia         | Prevotellaceae        | Prevotella_9                   | 1344.78 | 2184.64 | 675.17 | 0.15 |

|                |                     |                                 |                          |         |         |        |      |
|----------------|---------------------|---------------------------------|--------------------------|---------|---------|--------|------|
| Firmicutes     | Clostridia          | Peptococcaceae                  | NA                       | 2.29    | 3.58    | 0.61   | 0.15 |
| Proteobacteria | Gammaproteobacteria | Pasteurellaceae                 | Haemophilus              | 93.83   | 65.94   | 27.52  | 0.15 |
| Actinobacteria | Coriobacteriia      | Eggerthellaceae                 | NA                       | 95.20   | 80.95   | 11.11  | 0.15 |
| Firmicutes     | Clostridia          | Lachnospiraceae                 | Lachnospiraceae_UCG-008  | 31.22   | 25.32   | 5.06   | 0.16 |
| Firmicutes     | Clostridia          | Family_XIII                     | Family_XIII_AD3011_group | 54.59   | 44.70   | 10.09  | 0.16 |
| Firmicutes     | Clostridia          | Ruminococcaceae                 | Candidatus_Soleaferrea   | 6.82    | 4.08    | 1.39   | 0.18 |
| Proteobacteria | Gammaproteobacteria | Burkholderiaceae                | Sutterella               | 119.28  | 100.68  | 13.34  | 0.18 |
| Firmicutes     | Clostridia          | Lachnospiraceae                 | CAG-56                   | 129.53  | 108.30  | 16.04  | 0.19 |
| Actinobacteria | Coriobacteriia      | Coriobacteriales_Incertae_Sedis | NA                       | 9.06    | 5.99    | 1.60   | 0.19 |
| Proteobacteria | Deltaproteobacteria | Desulfovibrionaceae             | Bilophila                | 27.30   | 23.77   | 4.71   | 0.21 |
| Firmicutes     | Clostridia          | Lachnospiraceae                 | Coprococcus_3            | 224.07  | 187.07  | 27.56  | 0.22 |
| Firmicutes     | Clostridia          | Ruminococcaceae                 | Ruminococcaceae_UCG-003  | 89.41   | 108.96  | 13.98  | 0.22 |
| Firmicutes     | Clostridia          | Lachnospiraceae                 | Howardella               | 12.54   | 10.49   | 2.67   | 0.24 |
| Firmicutes     | Clostridia          | Ruminococcaceae                 | UBA1819                  | 23.47   | 9.70    | 8.97   | 0.24 |
| Firmicutes     | Clostridia          | Lachnospiraceae                 | Lachnospiraceae_UCG-001  | 116.52  | 149.00  | 27.09  | 0.25 |
| Firmicutes     | Erysipelotrichia    | Erysipelotrichaceae             | Merdibacter              | 11.55   | 7.83    | 2.77   | 0.25 |
| Bacteroidetes  | Bacteroidia         | Prevotellaceae                  | Prevotella_7             | 88.13   | 43.88   | 26.66  | 0.25 |
| Proteobacteria | Deltaproteobacteria | Desulfovibrionaceae             | NA                       | 5.57    | 4.36    | 1.09   | 0.26 |
| Firmicutes     | Clostridia          | Ruminococcaceae                 | Ruminococcaceae_UCG-010  | 84.22   | 71.79   | 10.01  | 0.26 |
| Firmicutes     | Clostridia          | Ruminococcaceae                 | Fournierella             | 6.28    | 4.60    | 1.16   | 0.27 |
| Firmicutes     | Clostridia          | Family_XIII                     | Mogibacterium            | 1.57    | 0.60    | 0.60   | 0.27 |
| Firmicutes     | Clostridia          | Lachnospiraceae                 | Hungatella               | 4.93    | 2.33    | 1.83   | 0.27 |
| Firmicutes     | Clostridia          | Ruminococcaceae                 | Subdoligranulum          | 3311.80 | 2935.40 | 466.37 | 0.32 |
| Firmicutes     | Erysipelotrichia    | Erysipelotrichaceae             | Holdemanella             | 265.34  | 296.06  | 50.79  | 0.32 |
| Bacteroidetes  | Bacteroidia         | Prevotellaceae                  | Paraprevotella           | 30.78   | 29.03   | 5.20   | 0.34 |
| Proteobacteria | Gammaproteobacteria | Enterobacteriaceae              | Klebsiella               | 22.57   | 76.22   | 38.88  | 0.34 |
| Firmicutes     | Clostridia          | Ruminococcaceae                 | Ruminiclostridium_6      | 235.78  | 183.68  | 48.31  | 0.35 |
| Firmicutes     | Negativicutes       | Acidaminococcaceae              | Acidaminococcus          | 20.93   | 11.89   | 6.68   | 0.35 |
| Firmicutes     | Clostridia          | NA                              | NA                       | 1.23    | 0.97    | 0.24   | 0.35 |

|                |                  |                       |                               |         |         |        |      |
|----------------|------------------|-----------------------|-------------------------------|---------|---------|--------|------|
| Firmicutes     | Clostridia       | Lachnospiraceae       | Lachnospiraceae_ND3007_group  | 377.15  | 409.98  | 36.50  | 0.35 |
| Bacteroidetes  | Bacteroidia      | Marinifilaceae        | Odoribacter                   | 47.55   | 53.98   | 6.33   | 0.36 |
| Actinobacteria | Actinobacteria   | Bifidobacteriaceae    | Bifidobacterium               | 942.23  | 1163.59 | 178.29 | 0.37 |
| Firmicutes     | Clostridia       | Ruminococcaceae       | Fecalibacterium               | 5154.16 | 4869.92 | 399.52 | 0.37 |
| Firmicutes     | Bacilli          | Streptococcaceae      | Lactococcus                   | 11.00   | 15.63   | 4.44   | 0.38 |
| Firmicutes     | Clostridia       | Lachnospiraceae       | Coprococcus_2                 | 689.90  | 804.51  | 140.26 | 0.38 |
| Actinobacteria | Coriobacteriia   | Eggerthellaceae       | Enterorhabdus                 | 66.77   | 58.18   | 10.73  | 0.41 |
| Firmicutes     | Clostridia       | Lachnospiraceae       | GCA-900066575                 | 17.58   | 15.46   | 2.08   | 0.44 |
| Firmicutes     | Clostridia       | Ruminococcaceae       | Ruminococcaceae_UCG-002       | 1131.35 | 1052.08 | 146.65 | 0.44 |
| Firmicutes     | Erysipelotrichia | Erysipelotrichaceae   | Erysipelotrichaceae_UCG-003   | 226.99  | 192.24  | 41.24  | 0.44 |
| Firmicutes     | Clostridia       | Peptostreptococcaceae | Terrisporobacter              | 62.71   | 81.48   | 21.69  | 0.45 |
| Firmicutes     | Clostridia       | Lachnospiraceae       | Lachnospiraceae_NK4A136_group | 457.00  | 383.24  | 68.29  | 0.45 |
| Firmicutes     | Clostridia       | Ruminococcaceae       | Ruminococcaceae_UCG-014       | 841.07  | 754.52  | 108.58 | 0.47 |
| Firmicutes     | Clostridia       | Lachnospiraceae       | Lachnospiraceae_AC2044_group  | 10.98   | 18.65   | 7.50   | 0.48 |
| Firmicutes     | Erysipelotrichia | Erysipelotrichaceae   | Turicibacter                  | 91.35   | 111.28  | 23.94  | 0.48 |
| Firmicutes     | Clostridia       | Ruminococcaceae       | Ruminococcaceae_UCG-011       | 1.14    | 1.56    | 0.42   | 0.48 |
| Firmicutes     | Negativicutes    | Acidaminococcaceae    | Phascolarctobacterium         | 181.57  | 198.77  | 41.31  | 0.50 |
| Firmicutes     | Bacilli          | Carnobacteriaceae     | Granulicatella                | 0.83    | 0.60    | 0.25   | 0.50 |
| Firmicutes     | Clostridia       | Ruminococcaceae       | Flavonifractor                | 12.46   | 11.17   | 1.75   | 0.51 |
| Firmicutes     | NA               | NA                    | NA                            | 10.54   | 9.57    | 2.29   | 0.51 |
| Actinobacteria | Coriobacteriia   | Eggerthellaceae       | Gordonibacter                 | 1.35    | 1.70    | 0.37   | 0.52 |
| Firmicutes     | Clostridia       | Ruminococcaceae       | Caproiciproducens             | 7.87    | 6.98    | 1.59   | 0.53 |
| Firmicutes     | Clostridia       | Ruminococcaceae       | Ruminococcaceae_UCG-004       | 50.34   | 44.88   | 7.47   | 0.54 |
| Firmicutes     | Clostridia       | Ruminococcaceae       | Phoceae                       | 0.47    | 0.68    | 0.25   | 0.55 |
| Firmicutes     | Clostridia       | Ruminococcaceae       | Anaerotruncus                 | 6.00    | 5.36    | 2.19   | 0.59 |
| Bacteroidetes  | Bacteroidia      | Barnesiellaceae       | Barnesiella                   | 145.83  | 132.43  | 25.70  | 0.62 |

|                |                     |                     |                               |         |         |        |      |
|----------------|---------------------|---------------------|-------------------------------|---------|---------|--------|------|
| Firmicutes     | Clostridia          | Lachnospiraceae     | NA                            | 1847.16 | 1918.00 | 114.99 | 0.62 |
| Firmicutes     | Clostridia          | Ruminococcaceae     | GCA-900066225                 | 5.69    | 4.94    | 1.27   | 0.63 |
| Firmicutes     | Clostridia          | Christensenellaceae | Christensenellaceae_R-7_group | 1502.70 | 1417.41 | 160.78 | 0.63 |
| Firmicutes     | Clostridia          | Ruminococcaceae     | Intestinimonas                | 76.14   | 71.03   | 10.33  | 0.63 |
| Firmicutes     | Clostridia          | Lachnospiraceae     | Eisenbergiella                | 2.93    | 2.23    | 1.06   | 0.63 |
| Firmicutes     | Clostridia          | Lachnospiraceae     | Tyzzereella_3                 | 22.09   | 27.75   | 11.21  | 0.64 |
| Actinobacteria | Coriobacteriia      | Atopobiaceae        | Olsenella                     | 12.79   | 13.86   | 3.33   | 0.65 |
| Firmicutes     | Clostridia          | Ruminococcaceae     | Ruminiclostridium_9           | 104.62  | 109.01  | 11.21  | 0.65 |
| Firmicutes     | Clostridia          | Christensenellaceae | NA                            | 214.41  | 243.77  | 60.02  | 0.65 |
| Firmicutes     | Erysipelotrichia    | Erysipelotrichaceae | Catenibacterium               | 284.89  | 243.09  | 70.12  | 0.66 |
| Firmicutes     | Clostridia          | Lachnospiraceae     | Anaerostipes                  | 507.04  | 553.95  | 84.98  | 0.66 |
| Firmicutes     | Clostridia          | Ruminococcaceae     | Oscillibacter                 | 60.39   | 53.86   | 11.86  | 0.68 |
| Firmicutes     | Clostridia          | Lachnospiraceae     | Sellimonas                    | 3.94    | 4.37    | 0.77   | 0.68 |
| Actinobacteria | Actinobacteria      | Actinomycetaceae    | Actinomyces                   | 20.75   | 19.50   | 3.32   | 0.70 |
| Firmicutes     | Clostridia          | Ruminococcaceae     | Ruminococcus_1                | 456.75  | 501.79  | 83.25  | 0.71 |
| Firmicutes     | Clostridia          | Ruminococcaceae     | Ruminiclostridium             | 1.36    | 1.54    | 0.37   | 0.73 |
| Firmicutes     | Negativicutes       | Veillonellaceae     | Veillonella                   | 93.28   | 106.86  | 33.72  | 0.73 |
| Firmicutes     | Clostridia          | Lachnospiraceae     | Blautia                       | 2789.05 | 2726.91 | 167.00 | 0.74 |
| Bacteroidetes  | Bacteroidia         | Barnesiellaceae     | Coprobacter                   | 4.93    | 5.36    | 1.77   | 0.75 |
| Proteobacteria | Gammaproteobacteria | Burkholderiaceae    | Oxalobacter                   | 4.41    | 4.02    | 1.04   | 0.75 |
| Actinobacteria | Coriobacteriia      | Coriobacteriaceae   | Collinsella                   | 722.44  | 688.30  | 80.96  | 0.76 |
| Firmicutes     | Clostridia          | Ruminococcaceae     | Pseudoflavonifractor          | 2.55    | 2.34    | 0.66   | 0.76 |
| Firmicutes     | Clostridia          | Lachnospiraceae     | Lachnoclostridium             | 263.34  | 252.68  | 40.26  | 0.79 |
| Firmicutes     | Erysipelotrichia    | Erysipelotrichaceae | Coprobacillus                 | 3.91    | 5.07    | 3.25   | 0.80 |
| Firmicutes     | Clostridia          | Ruminococcaceae     | CAG-352                       | 242.31  | 290.23  | 155.19 | 0.81 |
| Firmicutes     | Clostridia          | Lachnospiraceae     | Agathobacter                  | 2661.19 | 2575.52 | 373.58 | 0.81 |
| Firmicutes     | Clostridia          | Lachnospiraceae     | Dorea                         | 510.65  | 518.70  | 35.98  | 0.85 |

|                |                     |                       |                         |         |         |        |      |
|----------------|---------------------|-----------------------|-------------------------|---------|---------|--------|------|
| Lentisphaerae  | Lentisphaeria       | Victivallaceae        | Victivallis             | 4.60    | 4.46    | 2.12   | 0.86 |
| Proteobacteria | Alphaproteobacteria | NA                    | NA                      | 45.86   | 48.97   | 20.09  | 0.89 |
| Firmicutes     | Bacilli             | Streptococcaceae      | Streptococcus           | 450.58  | 469.33  | 124.06 | 0.92 |
| Actinobacteria | Coriobacteriia      | Eggerthellaceae       | Slackia                 | 20.54   | 20.13   | 3.02   | 0.92 |
| Firmicutes     | Erysipelotrichia    | Erysipelotrichaceae   | Holdemania              | 3.49    | 3.40    | 0.83   | 0.93 |
| Firmicutes     | Clostridia          | Lachnospiraceae       | Lachnospiraceae_UCG-004 | 79.11   | 80.21   | 10.32  | 0.94 |
| Firmicutes     | Clostridia          | NA                    | NA                      | 307.27  | 303.76  | 104.14 | 0.95 |
| Firmicutes     | Clostridia          | Ruminococcaceae       | Papillibacter           | 1.95    | 1.91    | 0.53   | 0.95 |
| Firmicutes     | Clostridia          | NA                    | NA                      | 57.60   | 56.64   | 28.21  | 0.97 |
| Firmicutes     | Clostridia          | Peptostreptococcaceae | NA                      | 1.84    | 1.87    | 0.57   | 0.97 |
| Lentisphaerae  | Lentisphaeria       | vadinBE97             | NA                      | 1.76    | 1.75    | 0.79   | 0.99 |
| Bacteroidetes  | Bacteroidia         | Bacteroidaceae        | Bacteroides             | 3890.86 | 3885.54 | 358.32 | 0.99 |
| Firmicutes     | Erysipelotrichia    | Erysipelotrichaceae   | Erysipelatoclostridium  | 7.32    | 7.34    | 1.99   | 0.99 |

\*The least square mean and standard error of genera abundance was obtained by mixed modelling (n=20 subjects). The effects of diet were evaluated using a generalized linear mixed model that included a fixed effect of diet, sequence of allocation, and their interaction. Bold letters denote bacterial genera that significantly differed between meat and vegetarian diets.

# Genera selected using multilevel random forest modelling as optimal for discriminating vegetarian diet from meat diet.

**Table S9. Fecal levels of short chain fatty acids and branched chain fatty acids relative to dietary intervention.**

|             | Post-MD* | Post-VD* | SEM  | Percent difference |
|-------------|----------|----------|------|--------------------|
| Acetate     | 90.3     | 94.0     | 8.3  | 4.1                |
| Butyrate    | 34.0     | 35.7     | 4.9  | 5                  |
| Propionate  | 29.1     | 32       | 3.6  | 9.9                |
| Lactate     | 0.64     | 0.3      | 0.3  | -53.1              |
| Succinate   | 0.1      | 0.1      | 0.03 | 12                 |
| Isobutyrate | 3.23     | 3.3      | 0.2  | 2.2                |
| Isovalerate | 2.7      | 2.8      | 0.2  | 5.6                |
| Total BCFAs | 5.9      | 6.2      | 0.4  | 5.8                |
| Total SCFAs | 154.0    | 162.0    | 15.0 | 5.2                |

\*The least square mean and standard error of fecal fatty acid level was obtained from mixed model (n=20 subjects). The effects of diet were evaluated using a generalized linear mixed model that included a fixed effect of diet, sequence of allocation, and their interaction. Percent difference indicates the median difference in concentration in vegetarian vs. meat diet. Total branched chain fatty acids (BCFA) = the sum of isobutyrate and isovalerate. Total short chain fatty acids (SCFA) = the sum of acetate, butyrate, and propionate.

**Table S10. Plasma levels of selected metabolites with respect to dietary intervention.**

| Metabolite                                                            | Ionization | m/z             | Retention time | Post MD*         | Post VD          | SEM             | <i>P Value</i>   |
|-----------------------------------------------------------------------|------------|-----------------|----------------|------------------|------------------|-----------------|------------------|
| <b>Unknown 180.8988</b>                                               | <b>RP-</b> | <b>182.8988</b> | <b>11.38</b>   | <b>16843.29</b>  | <b>14557.47</b>  | <b>633.66</b>   | <b>0.002</b>     |
| Cysteinyl-Cysteine                                                    | RP-        | 260.9793        | 0.70           | 6631.55          | 7853.38          | 492.19          | 0.066            |
| <b>Lignoceric acid</b>                                                | <b>RP-</b> | <b>367.3586</b> | <b>9.02</b>    | <b>36810.40</b>  | <b>43195.67</b>  | <b>1933.87</b>  | <b>0.025</b>     |
| <b>dihydroxy-stearic acid</b>                                         | <b>RP-</b> | <b>375.2750</b> | <b>7.00</b>    | <b>196729.93</b> | <b>169679.79</b> | <b>10085.60</b> | <b>0.018</b>     |
| <b>Unknown 481.2818</b>                                               | <b>RP-</b> | <b>481.2818</b> | <b>6.24</b>    | <b>16467.75</b>  | <b>26236.58</b>  | <b>5620.74</b>  | <b>0.023</b>     |
| <b>PC (14:0/O-1:0)</b>                                                | <b>RP-</b> | <b>526.3512</b> | <b>7.12</b>    | <b>15228.39</b>  | <b>11015.75</b>  | <b>906.87</b>   | <b>0.004</b>     |
| <b>lysoPC (16:1)</b>                                                  | <b>RP-</b> | <b>552.3308</b> | <b>6.82</b>    | <b>13045.53</b>  | <b>10808.43</b>  | <b>680.58</b>   | <b>0.009</b>     |
| Unknown 570.8316                                                      | RP-        | 570.8316        | 0.63           | 3844.64          | 4421.80          | 299.94          | 0.106            |
| <b>lysoPE (22:0)</b>                                                  | <b>RP-</b> | <b>592.3600</b> | <b>7.05</b>    | <b>12193.78</b>  | <b>8386.79</b>   | <b>947.67</b>   | <b>0.011</b>     |
| <b>DG (16:0/20:3)</b>                                                 | <b>RP-</b> | <b>653.4922</b> | <b>9.86</b>    | <b>4283.02</b>   | <b>5275.64</b>   | <b>334.29</b>   | <b>0.027</b>     |
| <b>PE (18:1/20:4)</b>                                                 | <b>RP-</b> | <b>748.5318</b> | <b>8.85</b>    | <b>18748.37</b>  | <b>12565.47</b>  | <b>1133.24</b>  | <b>0.000</b>     |
| <b>2-Hydroxy-lauroylcarnitine</b>                                     | <b>RP-</b> | <b>777.5494</b> | <b>8.46</b>    | <b>15513.48</b>  | <b>13221.52</b>  | <b>961.62</b>   | <b>0.035</b>     |
| <b>PE (18:1/18:1)</b>                                                 | <b>RP-</b> | <b>786.5671</b> | <b>8.89</b>    | <b>11655.84</b>  | <b>8956.61</b>   | <b>733.66</b>   | <b>0.004</b>     |
| <b>PE (20:3/18:1)</b>                                                 | <b>RP-</b> | <b>810.5666</b> | <b>8.80</b>    | <b>23648.56</b>  | <b>17826.32</b>  | <b>1149.66</b>  | <b>&lt;0.001</b> |
| <b>PE (20:2/18:1)</b>                                                 | <b>RP-</b> | <b>812.5822</b> | <b>8.96</b>    | <b>30155.11</b>  | <b>22896.73</b>  | <b>1162.19</b>  | <b>&lt;0.001</b> |
| PC (20:2/16:0)                                                        | RP-        | 820.5644        | 9.23           | 51624.88         | 44215.94         | 2679.98         | 0.066            |
| <b>PE (18:0/22:5)</b>                                                 | <b>RP-</b> | <b>822.5641</b> | <b>9.22</b>    | <b>21394.62</b>  | <b>16708.67</b>  | <b>1493.55</b>  | <b>0.040</b>     |
| <b>PC (18:1/22:4)</b>                                                 | <b>RP-</b> | <b>836.5812</b> | <b>8.88</b>    | <b>13050.88</b>  | <b>10243.25</b>  | <b>640.24</b>   | <b>0.004</b>     |
| <b>3-[3,5-dihydroxy-4-(sulfo-<br/>oxy)phenyl]-2-oxopropanoic acid</b> | <b>RP+</b> | <b>168.9820</b> | <b>11.48</b>   | <b>155146.44</b> | <b>182929.37</b> | <b>6860.20</b>  | <b>0.010</b>     |
| <b>3-Methylhistidine</b>                                              | <b>RP+</b> | <b>170.0908</b> | <b>0.63</b>    | <b>1943.89</b>   | <b>865.23</b>    | <b>355.01</b>   | <b>0.025</b>     |
| Hippurate                                                             | RP+        | 180.0651        | 2.90           | 515914.00        | 450011.66        | 58837.15        | 0.349            |
| 3-Indolepropionic acid                                                | RP-        | 190.0867        | 4.39           | 98007.09         | 122411.46        | 17291.84        | 0.259            |
| 2-Methylbutyrylcarnitine                                              | RP+        | 246.1697        | 2.52           | 38209.45         | 32777.99         | 3639.34         | 0.181            |
| <b>Subaphylline</b>                                                   | <b>RP+</b> | <b>247.1446</b> | <b>2.44</b>    | <b>52076.92</b>  | <b>118952.27</b> | <b>14585.80</b> | <b>0.002</b>     |
| <b>Acoric acid</b>                                                    | <b>RP+</b> | <b>286.2014</b> | <b>3.91</b>    | <b>147642.67</b> | <b>215322.85</b> | <b>17346.72</b> | <b>0.002</b>     |
| <b>4-hydroxy nonenal mercapturic<br/>acid</b>                         | <b>RP+</b> | <b>287.1510</b> | <b>5.80</b>    | <b>84412.33</b>  | <b>40256.93</b>  | <b>11244.85</b> | <b>0.012</b>     |
| <b>N-Acetylanonaine</b>                                               | <b>RP+</b> | <b>308.1297</b> | <b>5.80</b>    | <b>27288.67</b>  | <b>9587.51</b>   | <b>3534.59</b>  | <b>0.001</b>     |
| <b>Fatty acid 346.1231</b>                                            | <b>RP+</b> | <b>346.1231</b> | <b>4.55</b>    | <b>80258.08</b>  | <b>218453.19</b> | <b>39899.08</b> | <b>0.024</b>     |
| <b>Tetracosanedione</b>                                               | <b>RP+</b> | <b>366.3749</b> | <b>7.90</b>    | <b>84840.86</b>  | <b>45100.68</b>  | <b>9876.02</b>  | <b>0.008</b>     |
| <b>Unknown 464.193</b>                                                | <b>RP+</b> | <b>464.1931</b> | <b>4.60</b>    | <b>19418.79</b>  | <b>9724.71</b>   | <b>2506.99</b>  | <b>0.011</b>     |
| <b>lysoPC (16:0)</b>                                                  | <b>RP+</b> | <b>482.3620</b> | <b>7.12</b>    | <b>95512.54</b>  | <b>66500.01</b>  | <b>6965.84</b>  | <b>0.004</b>     |

|                       |            |                 |             |                  |                 |                |                  |
|-----------------------|------------|-----------------|-------------|------------------|-----------------|----------------|------------------|
| <b>PC (16:0/18:1)</b> | <b>RP+</b> | <b>742.5793</b> | <b>8.87</b> | <b>39397.84</b>  | <b>27681.81</b> | <b>2943.77</b> | <b>0.004</b>     |
| <b>PC (18:1/18:1)</b> | <b>RP+</b> | <b>768.5931</b> | <b>8.92</b> | <b>126228.97</b> | <b>82032.18</b> | <b>9985.77</b> | <b>&lt;0.001</b> |

\*The least square mean and standard error of metabolite level was obtained via mixed modelling (n=21 subjects). The effects of diet were evaluated using a generalized linear mixed model that included a fixed effect of diet, sequence of allocation, and their interaction. Bold letters denote the bacterial genera that significantly differed between meat and vegetarian diets.

DG, diacylglycerol, PE, phosphatidylethanolamine; PC, phosphatidylcholine. RP+: reverse phase chromatography positive ionization mode; RP-: reverse phase chromatography negative ionization mode.



**Table S11. Spearman correlation of bacterial genera and plasma metabolites with cardiometabolic risk factors, vegetarian diet.**

| Variables |                                      | Oxidized LDL |      | TC    |      | LDL   |      | BMI   |      | Weight |      |
|-----------|--------------------------------------|--------------|------|-------|------|-------|------|-------|------|--------|------|
|           |                                      | r            | P    | r     | P    | r     | P    | r     | P    | r      | P    |
| Genus     | Zotu1114_GCA.900066755               | -0.36        | 0.02 | -0.30 | 0.05 | -0.38 | 0.01 | -0.20 | 0.21 | -0.13  | 0.42 |
| Genus     | Zotu74_Ruminococcaceae_NK4A214_group | -0.51        | 0.00 | -0.30 | 0.06 | -0.37 | 0.02 | -0.19 | 0.22 | -0.25  | 0.11 |
| Genus     | Zotu822_Ruminococcaceae_UCG.007      | 0.24         | 0.13 | 0.26  | 0.10 | 0.36  | 0.02 | -0.03 | 0.83 | 0.00   | 1.00 |
| Genus     | Zotu647_Eggerthella                  | 0.31         | 0.04 | 0.38  | 0.01 | 0.35  | 0.02 | 0.09  | 0.58 | 0.17   | 0.28 |
| Genus     | Zotu62_Coproccoccus_1                | -0.37        | 0.02 | -0.29 | 0.06 | -0.33 | 0.03 | -0.06 | 0.69 | -0.12  | 0.46 |
| Genus     | Zotu87_Roseburia                     | 0.20         | 0.21 | 0.45  | 0.00 | 0.32  | 0.04 | -0.12 | 0.44 | -0.06  | 0.72 |
| Genus     | Zotu412_Butyricimonas                | 0.05         | 0.76 | 0.28  | 0.07 | 0.31  | 0.04 | 0.00  | 0.99 | 0.02   | 0.90 |
| Genus     | Zotu10_Ruminococcus_2                | -0.34        | 0.03 | -0.23 | 0.14 | -0.31 | 0.05 | -0.14 | 0.39 | -0.12  | 0.43 |
| Genus     | Zotu25_Escherichia.Shigella          | 0.29         | 0.06 | 0.38  | 0.01 | 0.31  | 0.05 | -0.21 | 0.19 | -0.16  | 0.31 |
| Genus     | Zotu152_Marvinbryantia               | -0.29        | 0.06 | -0.40 | 0.01 | -0.28 | 0.07 | -0.35 | 0.03 | -0.27  | 0.08 |
| Genus     | Zotu397_Oscillospira                 | -0.11        | 0.49 | -0.11 | 0.49 | -0.28 | 0.07 | 0.00  | 1.00 | -0.02  | 0.89 |
| Genus     | Zotu728_Shuttleworthia               | -0.43        | 0.00 | -0.32 | 0.04 | -0.27 | 0.08 | -0.05 | 0.76 | -0.10  | 0.53 |
| Genus     | Zotu832_Anaerofilum                  | 0.27         | 0.09 | 0.27  | 0.08 | 0.27  | 0.08 | -0.09 | 0.56 | 0.02   | 0.90 |
| Genus     | Zotu57_Parabacteroides               | 0.19         | 0.24 | 0.35  | 0.02 | 0.27  | 0.09 | 0.09  | 0.58 | 0.09   | 0.59 |
| Genus     | Zotu576_Angelakisella                | 0.08         | 0.61 | 0.28  | 0.07 | 0.26  | 0.10 | 0.18  | 0.27 | 0.23   | 0.15 |
| Genus     | Zotu239_NA                           | -0.21        | 0.18 | -0.28 | 0.08 | -0.24 | 0.13 | -0.05 | 0.75 | 0.01   | 0.97 |
| Genus     | Zotu398_DTU089                       | 0.17         | 0.30 | 0.28  | 0.07 | 0.22  | 0.15 | 0.08  | 0.63 | 0.11   | 0.49 |
| Genus     | Zotu788_NA                           | -0.42        | 0.01 | -0.11 | 0.48 | -0.20 | 0.20 | -0.07 | 0.66 | -0.07  | 0.66 |
| Genus     | Zotu63_Clostridium_sensu_stricto_1   | 0.02         | 0.89 | 0.11  | 0.50 | 0.20  | 0.21 | 0.28  | 0.07 | 0.30   | 0.05 |
| Genus     | Zotu191_Senegalimassilia             | 0.15         | 0.36 | 0.03  | 0.86 | 0.19  | 0.22 | 0.50  | 0.00 | 0.42   | 0.01 |
| Genus     | Zotu676_Hydrogenoanaerobacterium     | -0.32        | 0.04 | -0.23 | 0.14 | -0.16 | 0.32 | 0.04  | 0.80 | -0.08  | 0.62 |
| Genus     | Zotu58_Butyrivibrio                  | 0.02         | 0.92 | -0.09 | 0.56 | -0.15 | 0.34 | 0.31  | 0.05 | 0.30   | 0.06 |
| Genus     | Zotu13_Fusicatenibacter              | -0.17        | 0.29 | -0.14 | 0.36 | -0.15 | 0.34 | -0.20 | 0.21 | -0.14  | 0.36 |
| Genus     | Zotu50_Intestinibacter               | 0.12         | 0.45 | 0.11  | 0.48 | 0.14  | 0.37 | 0.05  | 0.74 | 0.17   | 0.29 |
| Genus     | Zotu307_NA                           | 0.04         | 0.81 | -0.21 | 0.18 | -0.13 | 0.42 | 0.08  | 0.62 | 0.01   | 0.96 |
| Genus     | Zotu262_Lachnospiraceae_UCG.010      | 0.29         | 0.06 | -0.11 | 0.49 | 0.13  | 0.42 | -0.03 | 0.85 | 0.02   | 0.90 |
| Genus     | Zotu60_Ruminiclostridium_5           | 0.04         | 0.81 | 0.14  | 0.38 | 0.12  | 0.45 | 0.25  | 0.11 | 0.27   | 0.09 |

|            |                                      |       |      |       |      |       |      |       |      |       |      |
|------------|--------------------------------------|-------|------|-------|------|-------|------|-------|------|-------|------|
| Genus      | Zotu145_Butyricoccus                 | -0.11 | 0.50 | -0.09 | 0.59 | -0.12 | 0.46 | -0.04 | 0.82 | -0.13 | 0.40 |
| Genus      | Zotu34_Ruminococcaceae_UCG.005       | -0.29 | 0.07 | -0.23 | 0.13 | -0.11 | 0.47 | 0.01  | 0.93 | -0.10 | 0.55 |
| Genus      | Zotu38_Alistipes                     | -0.08 | 0.61 | 0.17  | 0.28 | 0.11  | 0.49 | 0.01  | 0.95 | 0.00  | 0.98 |
| Genus      | Zotu334_NA                           | -0.21 | 0.18 | -0.16 | 0.31 | -0.11 | 0.49 | 0.23  | 0.14 | 0.19  | 0.24 |
| Genus      | Zotu481_UC5.1.2E3                    | 0.36  | 0.02 | 0.15  | 0.33 | 0.10  | 0.52 | -0.23 | 0.14 | -0.20 | 0.21 |
| Genus      | Zotu512_NA                           | -0.05 | 0.73 | 0.07  | 0.65 | 0.10  | 0.53 | 0.07  | 0.67 | 0.07  | 0.66 |
| Genus      | Zotu169_Lachnospiraceae_FCS020_group | 0.25  | 0.11 | 0.07  | 0.66 | 0.10  | 0.53 | -0.03 | 0.83 | 0.02  | 0.90 |
| Genus      | Zotu357_Family_XIII_UCG.001          | 0.35  | 0.02 | 0.12  | 0.46 | 0.10  | 0.53 | 0.03  | 0.84 | -0.05 | 0.75 |
| Genus      | Zotu629_DNF00809                     | -0.05 | 0.76 | -0.20 | 0.21 | -0.09 | 0.56 | 0.16  | 0.31 | 0.09  | 0.57 |
| Genus      | Zotu180_Lactobacillus                | 0.04  | 0.81 | 0.21  | 0.18 | 0.09  | 0.56 | 0.19  | 0.22 | 0.11  | 0.51 |
| Genus      | Zotu36_NA                            | -0.39 | 0.01 | -0.17 | 0.27 | -0.07 | 0.65 | 0.15  | 0.33 | 0.12  | 0.47 |
| Genus      | Zotu35_Dialister                     | -0.15 | 0.34 | -0.18 | 0.24 | -0.07 | 0.66 | 0.13  | 0.41 | -0.01 | 0.95 |
| Genus      | Zotu364_Negativibacillus             | 0.05  | 0.74 | 0.08  | 0.63 | 0.07  | 0.66 | 0.04  | 0.82 | 0.14  | 0.39 |
| Genus      | Zotu114_Methanobrevibacter           | -0.16 | 0.32 | -0.25 | 0.11 | -0.07 | 0.66 | 0.05  | 0.77 | -0.03 | 0.83 |
| Genus      | Zotu279_Adlercreutzia                | 0.02  | 0.88 | 0.13  | 0.40 | 0.07  | 0.66 | 0.20  | 0.20 | 0.18  | 0.24 |
| Genus      | Zotu2541_NA                          | 0.12  | 0.44 | 0.17  | 0.28 | 0.04  | 0.78 | -0.03 | 0.84 | -0.02 | 0.88 |
| Genus      | Zotu399_NA                           | -0.29 | 0.06 | 0.05  | 0.75 | -0.04 | 0.79 | -0.07 | 0.67 | -0.12 | 0.45 |
| Genus      | Zotu12_Akkermansia                   | -0.14 | 0.37 | -0.09 | 0.57 | -0.03 | 0.85 | 0.13  | 0.42 | 0.05  | 0.76 |
| Genus      | Zotu215_Parasutterella               | -0.15 | 0.35 | 0.12  | 0.46 | -0.03 | 0.86 | -0.10 | 0.53 | -0.23 | 0.14 |
| Metabolite | PC (18:1/18:1)                       | 0.55  | 0.00 | 0.21  | 0.19 | 0.33  | 0.04 | -0.14 | 0.38 | -0.17 | 0.29 |
| Metabolite | lysoPC (16:0)                        | 0.39  | 0.01 | 0.39  | 0.01 | 0.29  | 0.07 | -0.01 | 0.95 | 0.01  | 0.97 |
| Metabolite | DG (16:0/20:3)                       | -0.35 | 0.03 | -0.47 | 0.00 | -0.44 | 0.01 | -0.31 | 0.05 | -0.33 | 0.04 |
| Metabolite | lysoPC (16:1)                        | 0.35  | 0.03 | 0.38  | 0.01 | 0.25  | 0.12 | 0.19  | 0.23 | 0.14  | 0.40 |
| Metabolite | PE (18:0/22:5)                       | 0.34  | 0.03 | 0.28  | 0.08 | 0.37  | 0.02 | -0.06 | 0.69 | -0.17 | 0.29 |
| Metabolite | PC (14:0/O-1:0)                      | 0.25  | 0.12 | 0.27  | 0.09 | 0.23  | 0.15 | -0.03 | 0.87 | -0.13 | 0.43 |
| Metabolite | Subaphylline                         | -0.25 | 0.13 | 0.01  | 0.94 | -0.08 | 0.61 | -0.06 | 0.71 | -0.08 | 0.60 |
| Metabolite | PC (20:2/16:0)                       | 0.23  | 0.15 | 0.28  | 0.08 | 0.28  | 0.08 | 0.04  | 0.80 | 0.00  | 0.99 |
| Metabolite | PC (16:0/18:1)                       | 0.23  | 0.16 | 0.19  | 0.25 | 0.12  | 0.47 | -0.30 | 0.06 | -0.26 | 0.11 |
| Metabolite | lysoPE (22:0)                        | 0.21  | 0.18 | 0.20  | 0.22 | 0.21  | 0.18 | -0.08 | 0.62 | -0.09 | 0.59 |
| Metabolite | Lignoceric acid                      | -0.20 | 0.21 | -0.37 | 0.02 | -0.31 | 0.05 | -0.04 | 0.79 | -0.07 | 0.69 |

|            |                                                         |       |      |       |      |       |      |       |      |       |      |
|------------|---------------------------------------------------------|-------|------|-------|------|-------|------|-------|------|-------|------|
| Metabolite | Acoric acid                                             | -0.19 | 0.23 | -0.30 | 0.06 | -0.27 | 0.09 | -0.08 | 0.64 | -0.07 | 0.66 |
| Metabolite | Tetracosanedione                                        | 0.18  | 0.26 | 0.09  | 0.60 | 0.19  | 0.23 | -0.01 | 0.97 | 0.00  | 0.99 |
| Metabolite | PE (20:2/18:1)                                          | 0.16  | 0.32 | -0.16 | 0.34 | -0.07 | 0.65 | -0.21 | 0.19 | -0.31 | 0.05 |
| Metabolite | 2-Hydroxy lauroylcarnitine                              | 0.15  | 0.35 | 0.39  | 0.01 | 0.25  | 0.12 | 0.26  | 0.11 | 0.14  | 0.39 |
| Metabolite | Hippurate                                               | 0.15  | 0.36 | 0.28  | 0.09 | 0.13  | 0.42 | 0.33  | 0.04 | 0.24  | 0.14 |
| Metabolite | 3-Indolepropionic acid                                  | 0.14  | 0.38 | 0.15  | 0.34 | 0.25  | 0.12 | 0.24  | 0.14 | 0.15  | 0.34 |
| Metabolite | Unknown 464.193                                         | -0.11 | 0.50 | 0.13  | 0.43 | 0.17  | 0.28 | 0.06  | 0.71 | 0.02  | 0.88 |
| Metabolite | Unknown 481.2818                                        | -0.10 | 0.55 | -0.08 | 0.61 | -0.22 | 0.17 | 0.31  | 0.05 | 0.27  | 0.09 |
| Metabolite | 3-[3,5-dihydroxy-4-(sulfoxy)phenyl]-2-oxopropanoic acid | 0.10  | 0.55 | 0.15  | 0.34 | 0.02  | 0.89 | 0.15  | 0.34 | 0.21  | 0.19 |
| Metabolite | N-Acetylanonaine                                        | 0.10  | 0.56 | 0.35  | 0.03 | 0.22  | 0.17 | 0.16  | 0.32 | 0.18  | 0.27 |
| Metabolite | Unknown180.8988                                         | 0.09  | 0.57 | 0.02  | 0.91 | -0.08 | 0.61 | 0.36  | 0.02 | 0.24  | 0.14 |
| Metabolite | 3-Methylhistidine                                       | -0.09 | 0.58 | -0.10 | 0.55 | -0.16 | 0.34 | -0.13 | 0.43 | -0.20 | 0.22 |
| Metabolite | PE (18:1/18:1)                                          | -0.09 | 0.59 | -0.10 | 0.56 | -0.11 | 0.49 | -0.20 | 0.22 | -0.27 | 0.09 |
| Metabolite | 2-Methylbutyrylcarnitine                                | 0.08  | 0.63 | 0.04  | 0.81 | -0.05 | 0.78 | -0.24 | 0.14 | -0.30 | 0.06 |
| Metabolite | Cysteinyl-Cysteine                                      | -0.07 | 0.65 | -0.09 | 0.58 | -0.13 | 0.42 | 0.36  | 0.02 | 0.20  | 0.21 |
| Metabolite | Unknown570.8316                                         | -0.07 | 0.67 | 0.05  | 0.74 | -0.12 | 0.47 | 0.06  | 0.70 | 0.09  | 0.57 |
| Metabolite | PE (18:1/20:4)                                          | -0.04 | 0.81 | 0.13  | 0.43 | 0.07  | 0.66 | 0.07  | 0.65 | 0.01  | 0.94 |
| Metabolite | 4-hydroxy nonenal mercapturic acid                      | 0.03  | 0.84 | 0.22  | 0.17 | 0.17  | 0.29 | 0.21  | 0.19 | 0.17  | 0.30 |
| Metabolite | PC (18:1/22:4)                                          | 0.03  | 0.87 | 0.06  | 0.72 | 0.06  | 0.71 | -0.12 | 0.46 | -0.26 | 0.11 |
| Metabolite | dihydroxy-stearic acid                                  | 0.02  | 0.91 | 0.20  | 0.22 | 0.12  | 0.44 | 0.14  | 0.38 | 0.20  | 0.23 |
| Metabolite | PE (20:3/18:1)                                          | 0.01  | 0.94 | -0.12 | 0.48 | -0.08 | 0.60 | -0.22 | 0.17 | -0.28 | 0.08 |
| Metabolite | Fatty acid 346.1231                                     | 0.00  | 1.00 | 0.07  | 0.67 | 0.16  | 0.32 | 0.16  | 0.32 | 0.19  | 0.23 |

DG, diglycerides, PE, phatidylethanolamine; PC, phosphatidylcholines.

Figure S1. Descriptive analysis of abundance (A) and prevalence (B) of gut microbiota across samples.

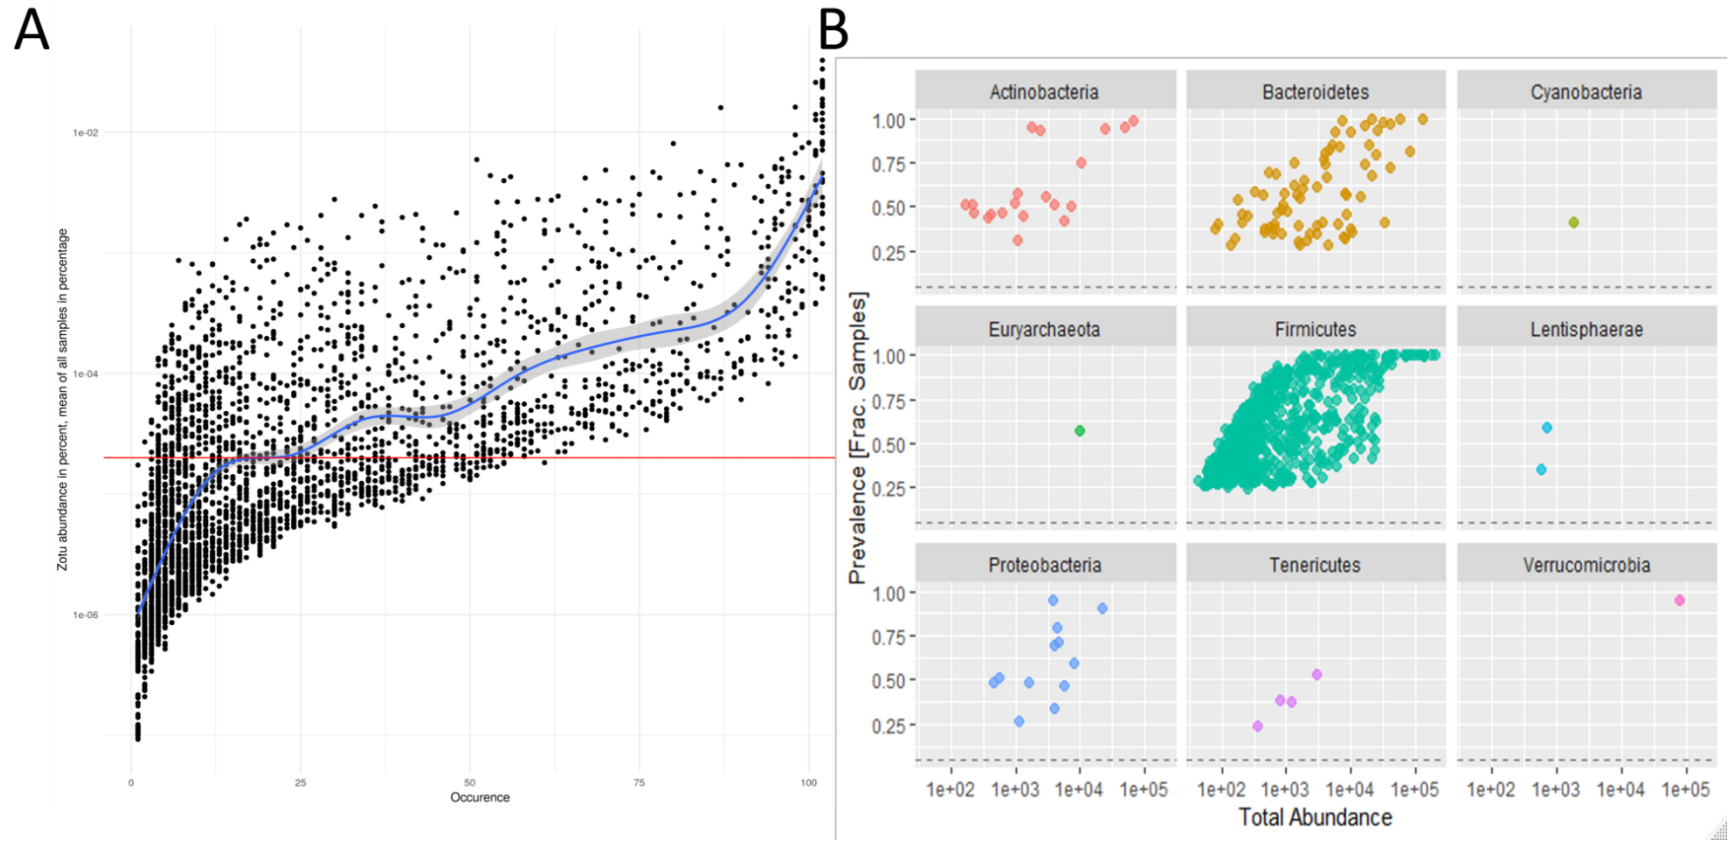

Figure S2. Structure of the effective dataset representing the within-individual variations between treatments. The effective dataset was subjected to multilevel random forest modelling.

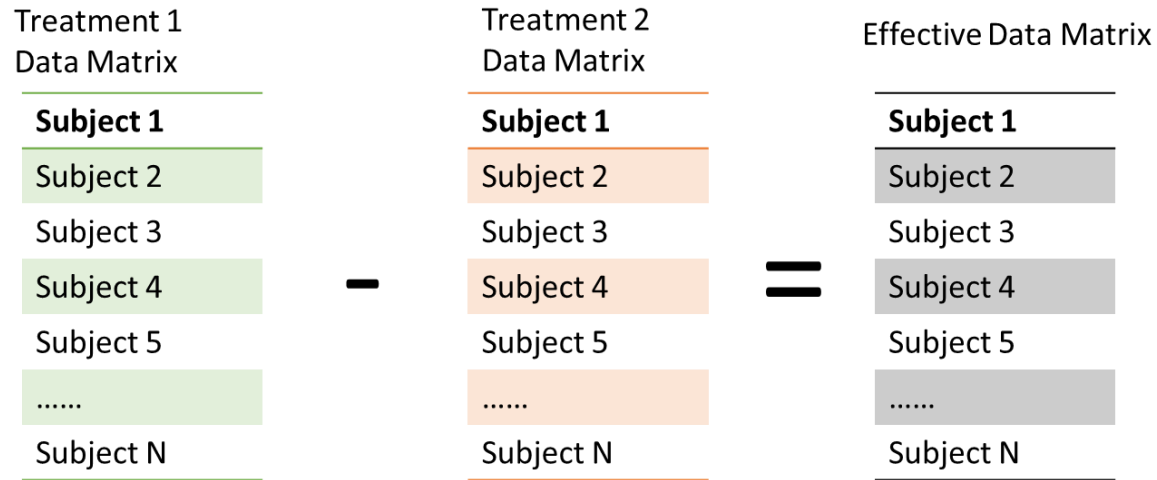

Figure S3. Difference in microbiota diversity and plasma metabolome of baseline and wash-out period.

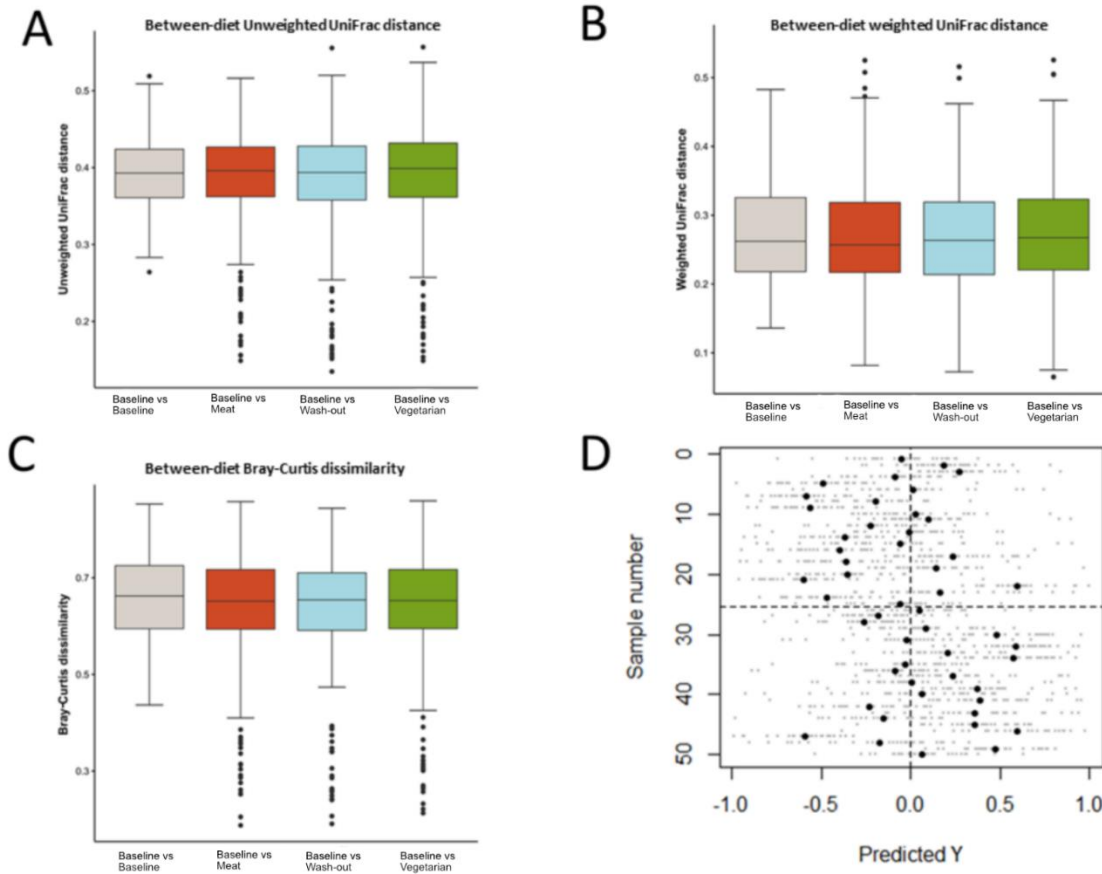

The between-diet distance in gut microbiota for all samples was assessed using (A) unweighted UniFrac, (B) weighted UniFrac and (C) Bray-Curtis. Random forest modeling of plasma metabolome between baseline and wash-out was conducted; model performance is shown in D. No significant difference in metabolome between sampling times was observed.

Figure S4. Time series analysis and mean changes in oxidized LDL according to dietary intervention.

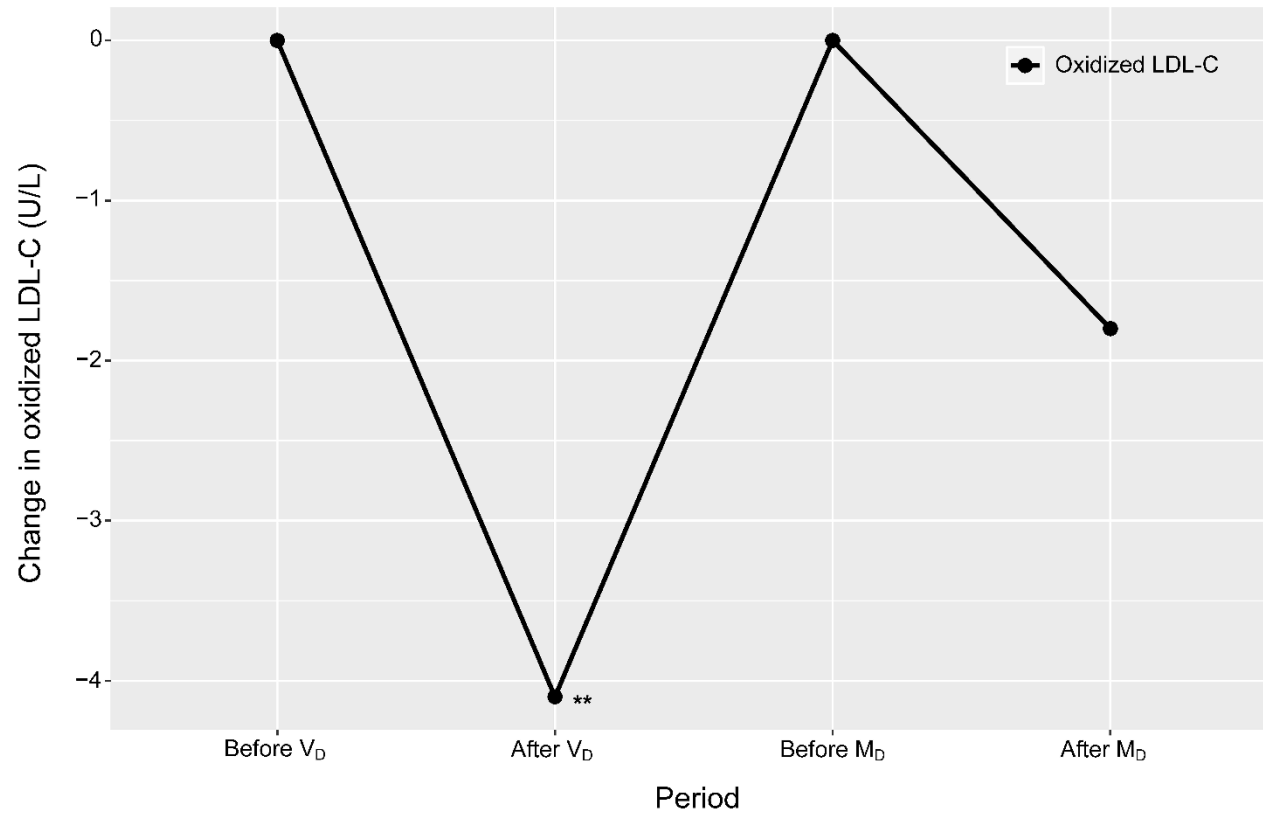

Within-group change P-value was calculated with paired t-test. \*\*P<0.01. LDL-C, low-density lipoprotein cholesterol; MD, meat diet; VD, vegetarian diet.

Figure S5. Time series analysis and mean changes in lipid profile according to dietary intervention.

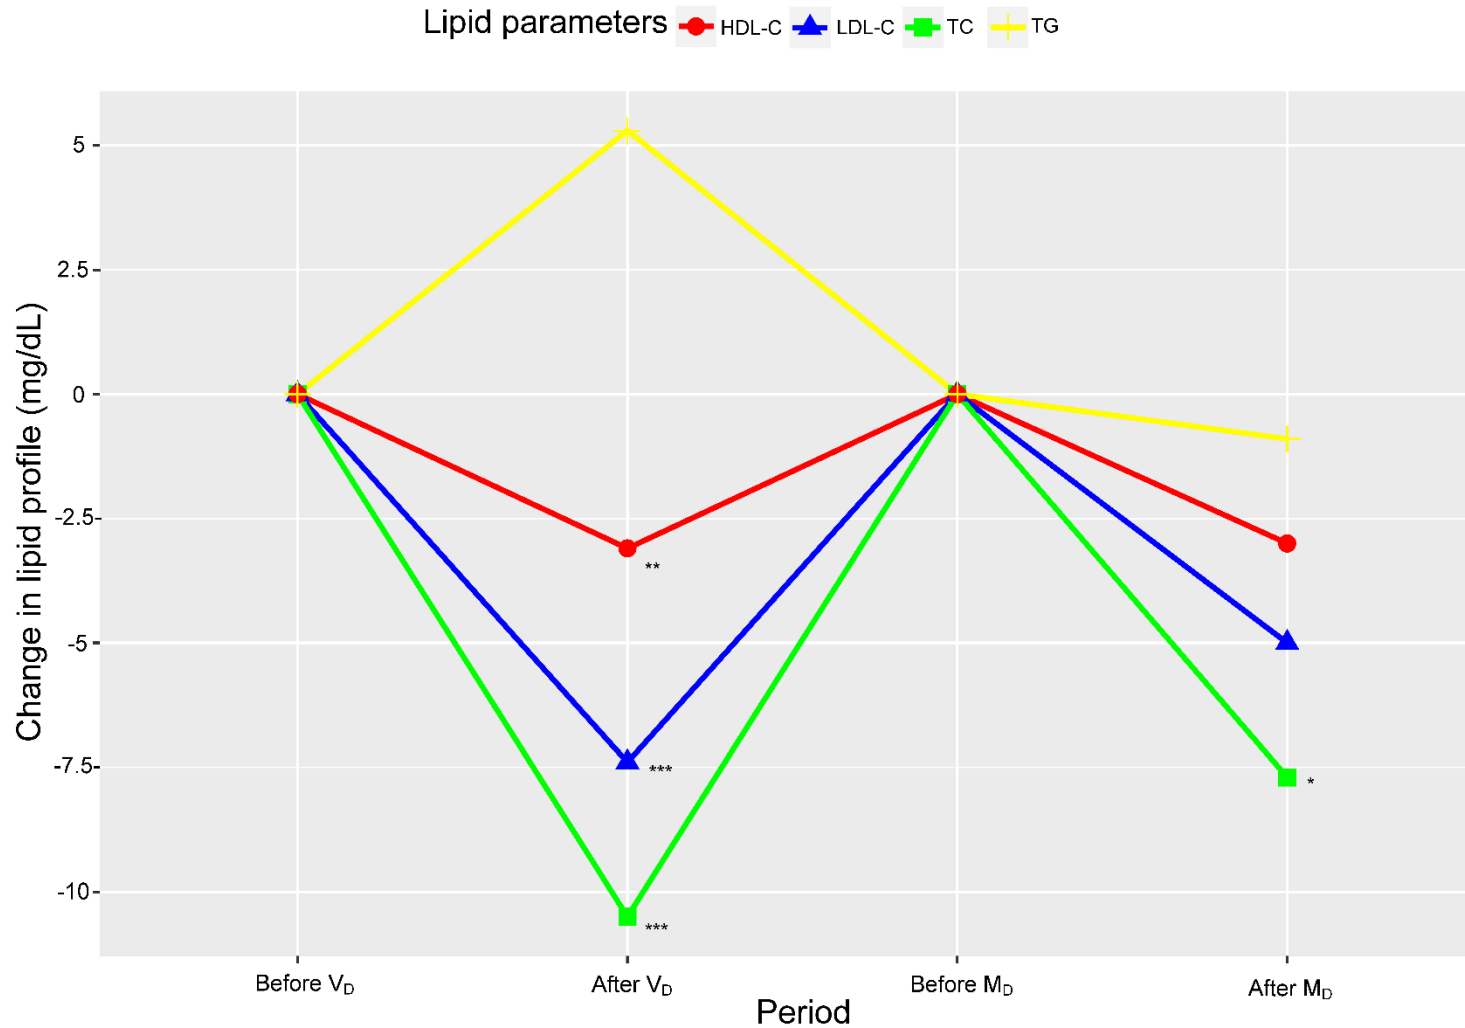

Within-group change P-value was calculated with paired t-test. \*P<0.05; \*\*P<0.01; \*\*\*P<0.001. HDL-C, high-density lipoprotein cholesterol; LDL-C, low-density lipoprotein cholesterol; MD, meat diet; TC, total cholesterol; TG, triglycerides; VD, vegetarian diet.



Figure S6. Relative abundance of gut microbiota at phylum (A) and genus level (B) representing the microbiome pattern across individuals with respect to diet period.

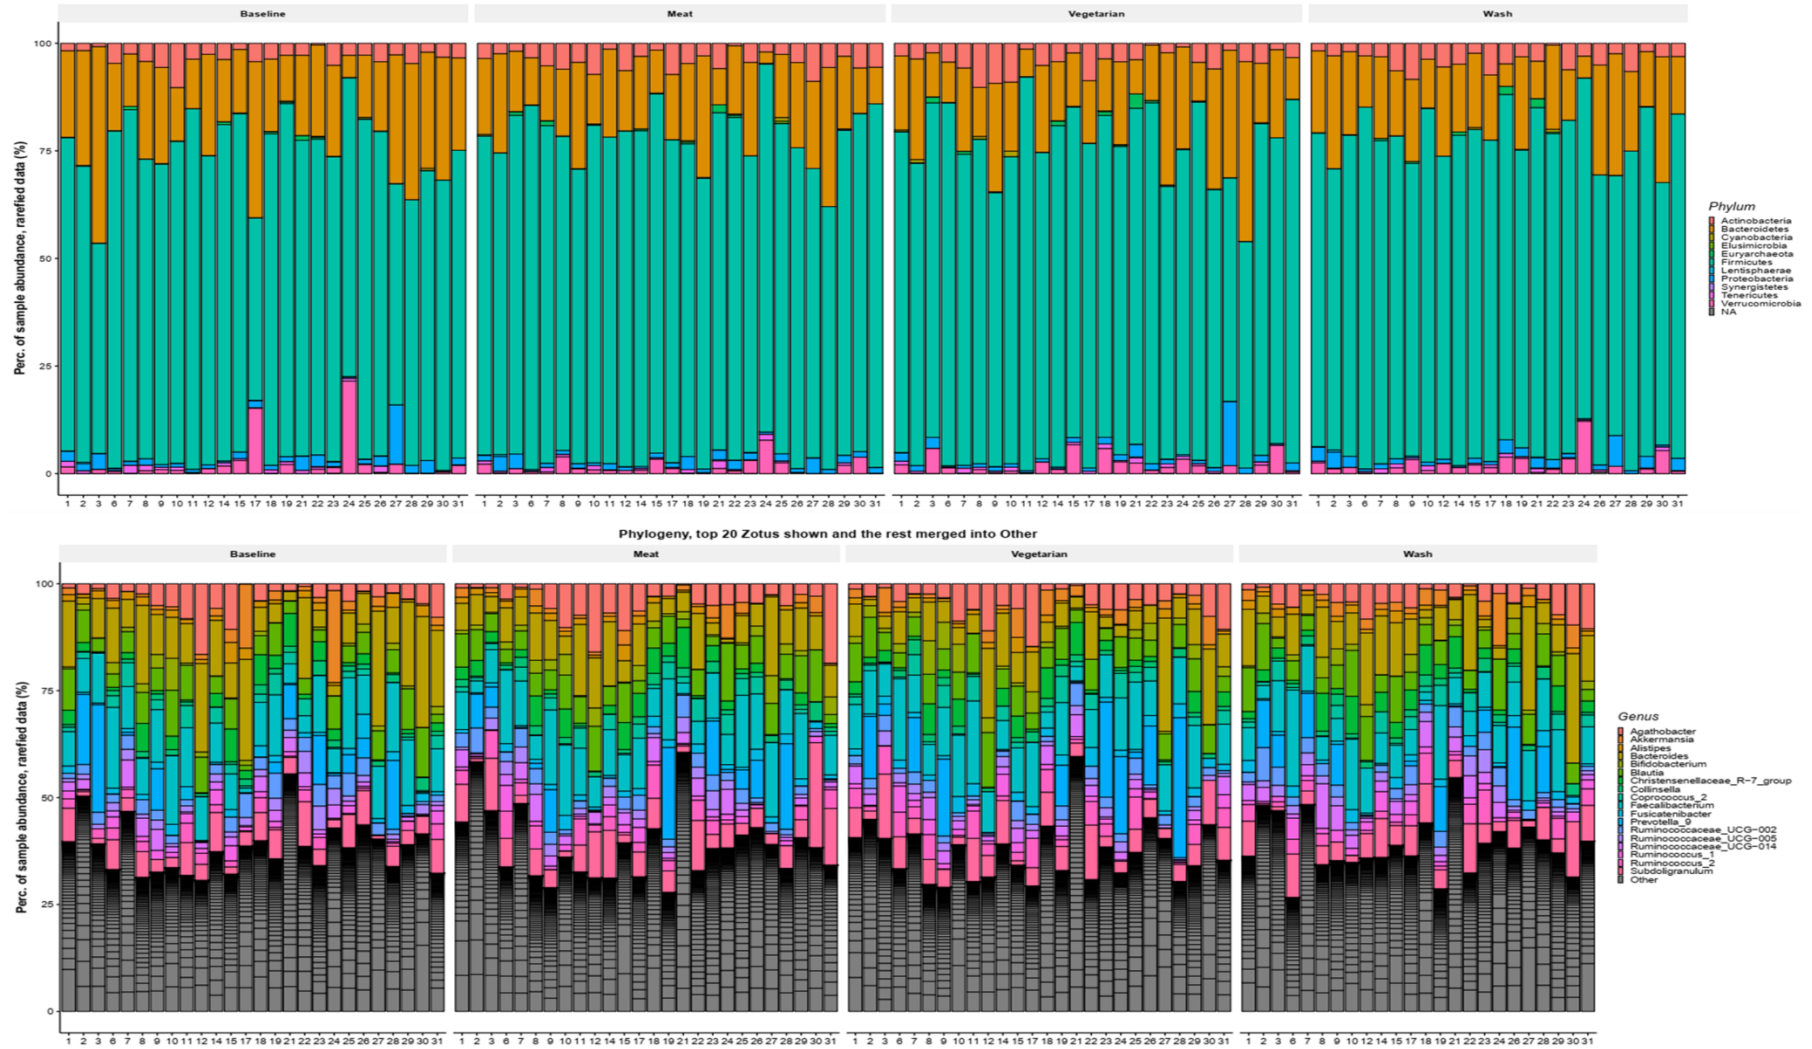

Figure S7. Gut microbiome diversity at four sampling times.

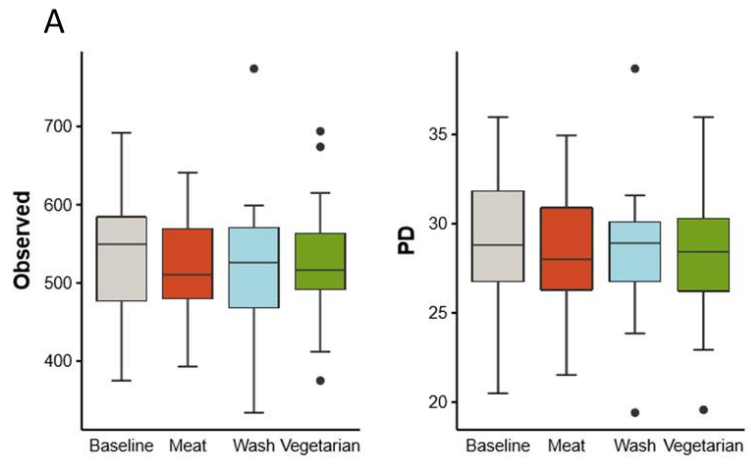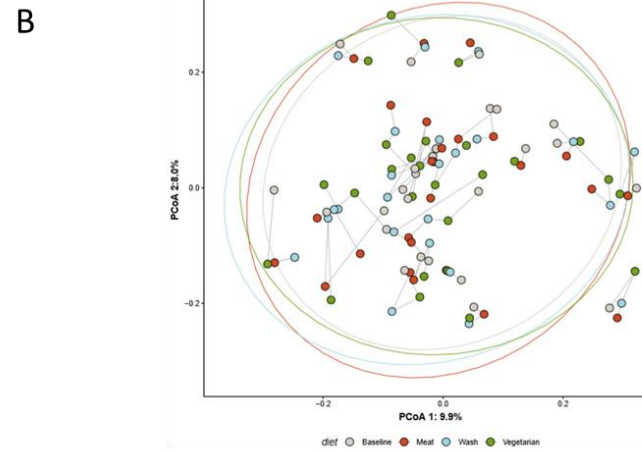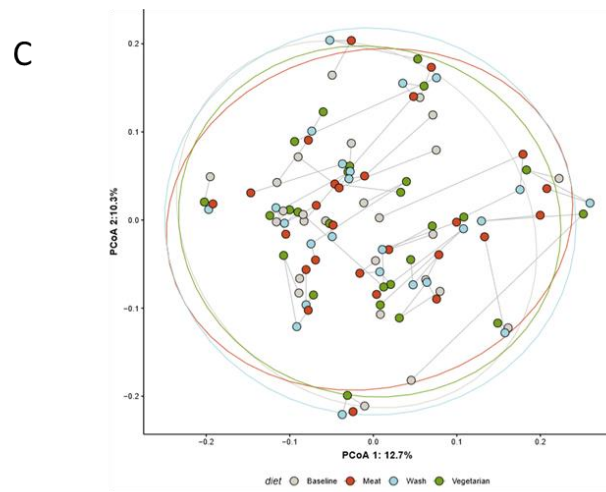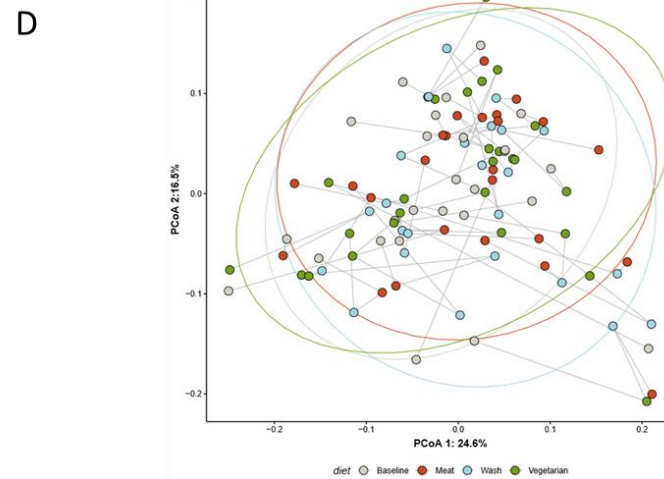

Observed species and Faith's Phylogenetic Diversity (A), PCoA plots for Bray-Curtis dissimilarity (B), Unweighted UniFrac (C), and weighted UniFrac (D). Grey lines in panels B, C, and D link samples obtained from an individual at different sampling times.

**Figure S8. Prediction of optimal selected bacteria genera using the random forest modeling based multilevel data analysis.**

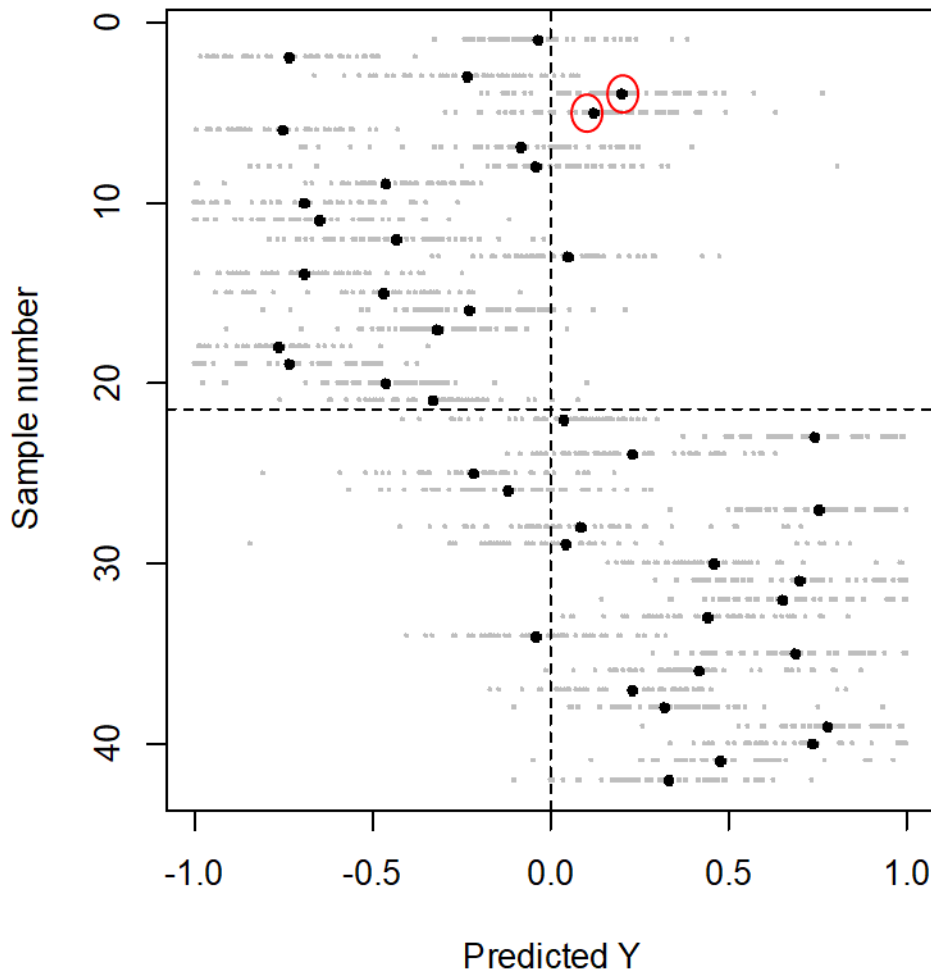

Samples are matched row-wise between upper and lower half for the treatment-effect matrix. Prediction estimates are shown in grey for each repetition of repeat double cross-validation and in black for the prediction estimates averaged over all repetitions. Misclassified samples are circled. The models showed high accuracy in discriminating the vegetarian diet from the meat diet.

**Figure S9. Prediction of optimally selected metabolites using the random forest modeling based multilevel data analysis of plasma metabolome by ESI+ (A) and ESI- (B).**

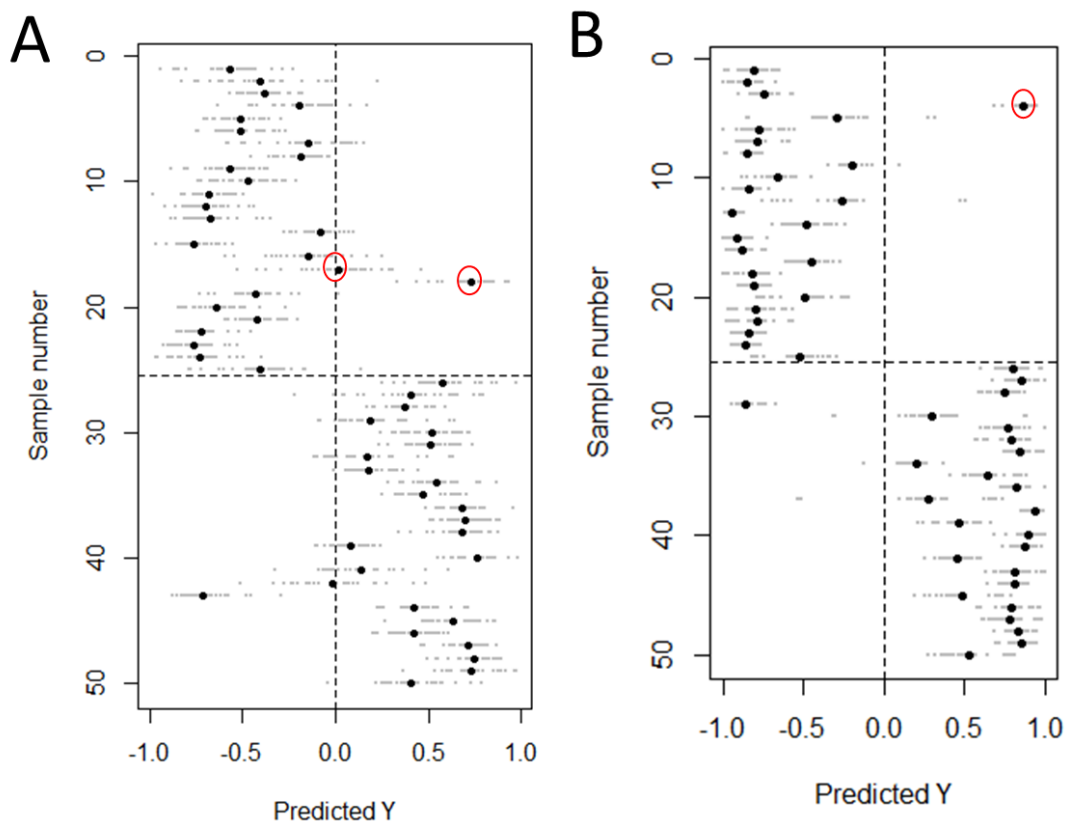

Samples are matched row-wise between upper and lower half for the treatment effect matrix. Prediction estimates are shown in grey for each repetition of repeat double cross-validation and in black for the estimates averaged over all repetitions. Misclassified samples are circled. The models showed high accuracy in discriminating the vegetarian diet from the meat diet.

**Figure S10. Time series analysis and mean changes in TMAO, Choline, L-carnitine and Acetyl-carnitine according to dietary intervention.**

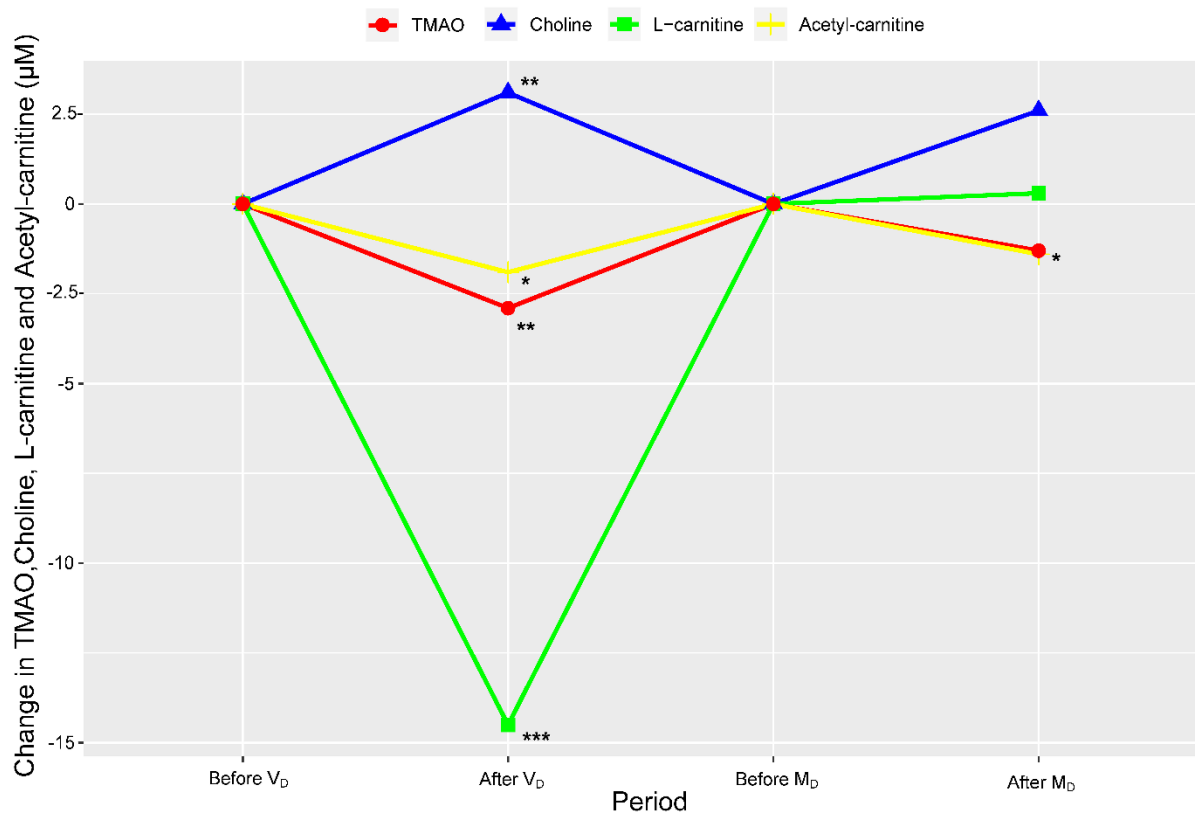

Within-group change P-value was calculated with paired t-test. \*P<0.05; \*\*P<0.01; \*\*\*P<0.001. µM, micromolar concentration. MD, meat diet; TMAO, trimethylamine N-oxide; VD, vegetarian diet.

**Figure S11. Correlations between plasma concentrations of trimethylamine N-oxide (TMAO), choline, L-carnitine and acetyl-carnitine and cardiometabolic risk factors (A) or the microbial genera (B) that were optimally selected to distinguish the vegetarian diet and the isocaloric meat diet using multilevel random forest algorithm.**

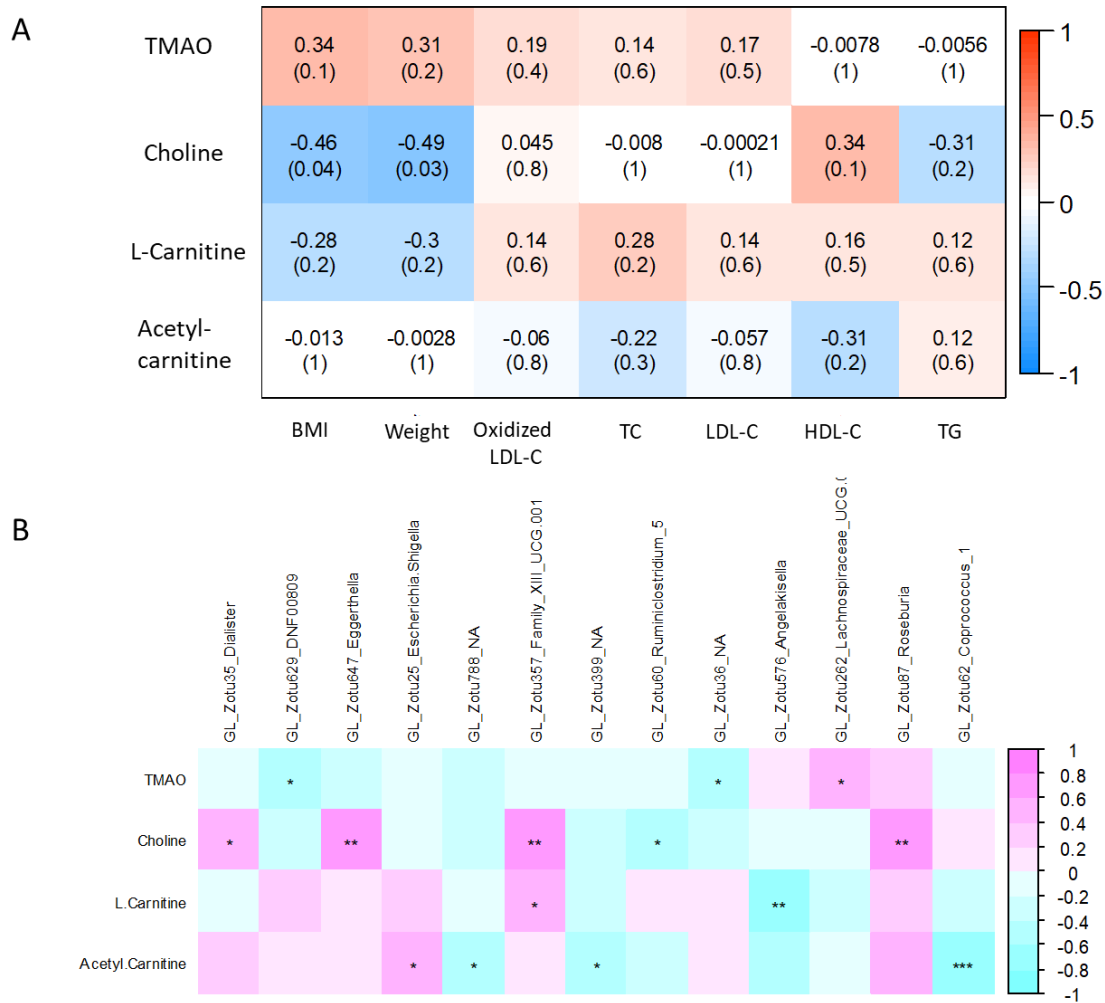

Only microbial genera that were significantly correlated with at least one of plasma metabolites are present (B).

\* $P < 0.05$ ; \*\* $P < 0.01$ ; \*\*\* $P < 0.001$ . None of the correlations remained significant after false-discovery-rate correction for multiple testing.

Figure S12. Baseline gut microbiota associated with response to diet with respect to BMI.

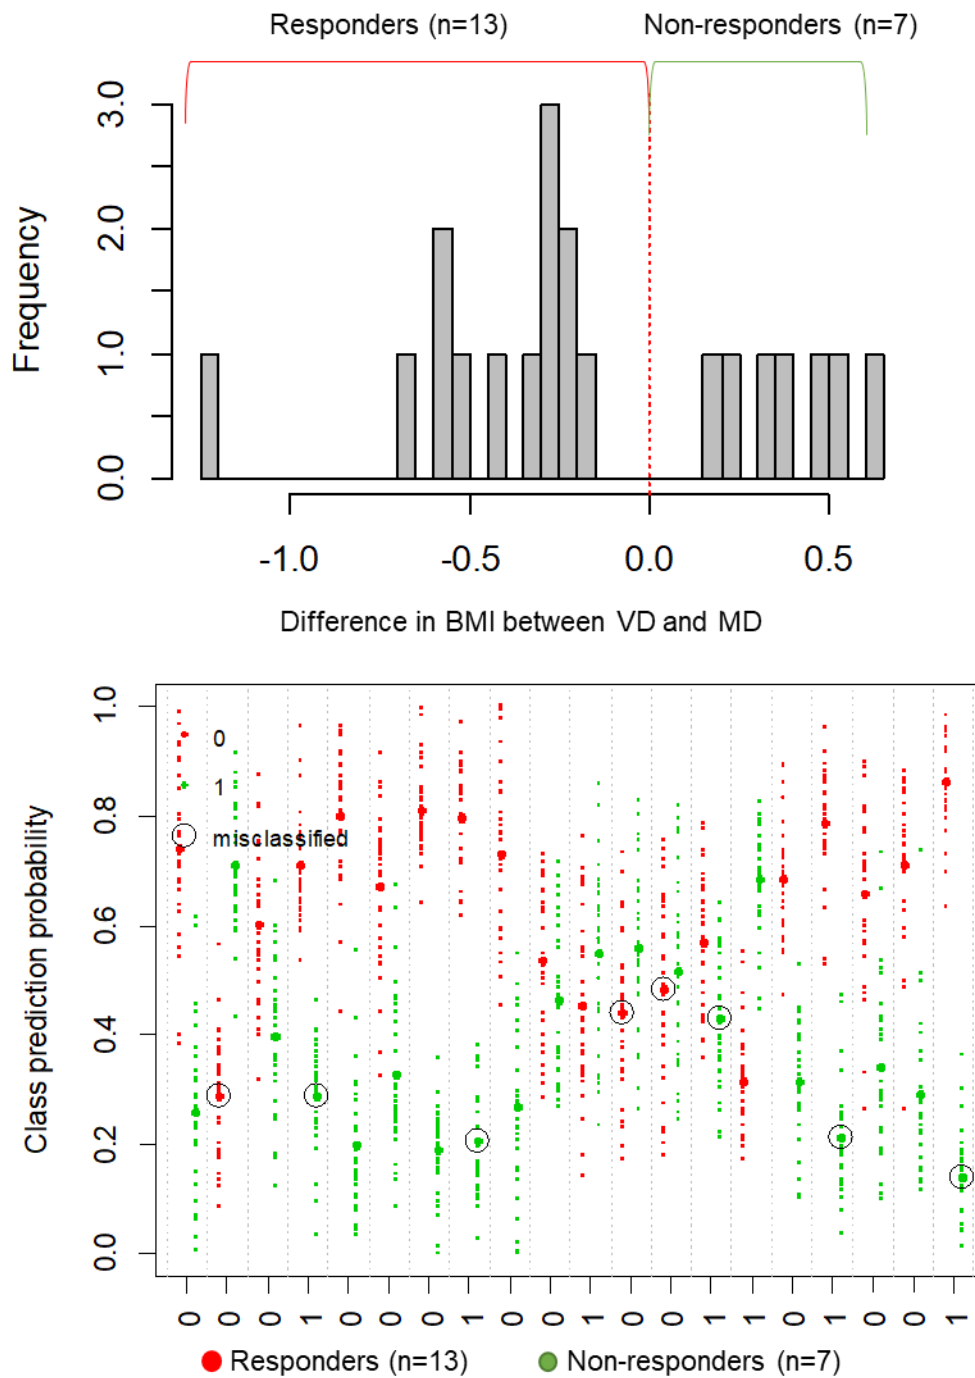

Subjects with lower BMI post-VD compared with post-MD were defined as responders.

Patients who had higher BMI after VD than MD were categorized as non-responders.



Figure S13. Baseline plasma metabolome showed no association with diet-related change in oxidized LDL-C (A and B) or BMI (C and D).

A

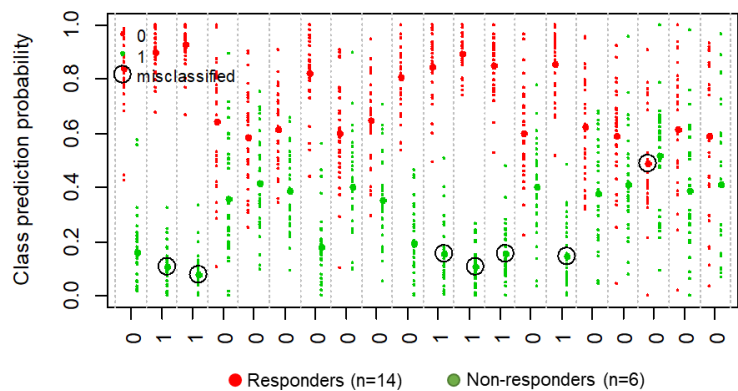

B

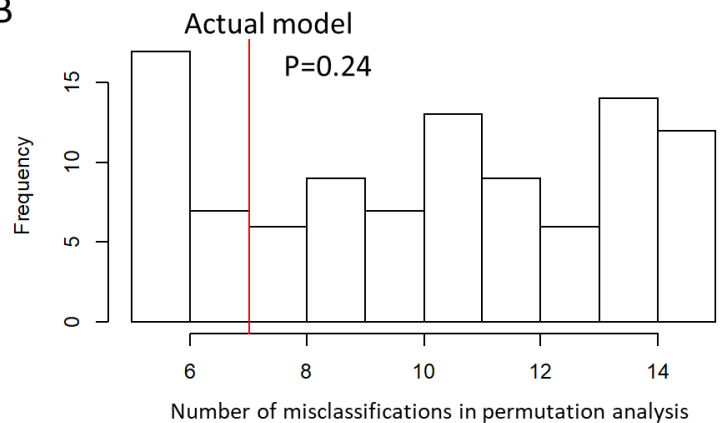

C

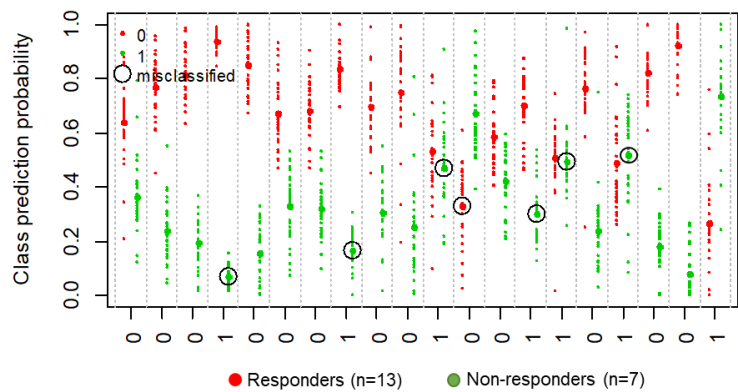

D

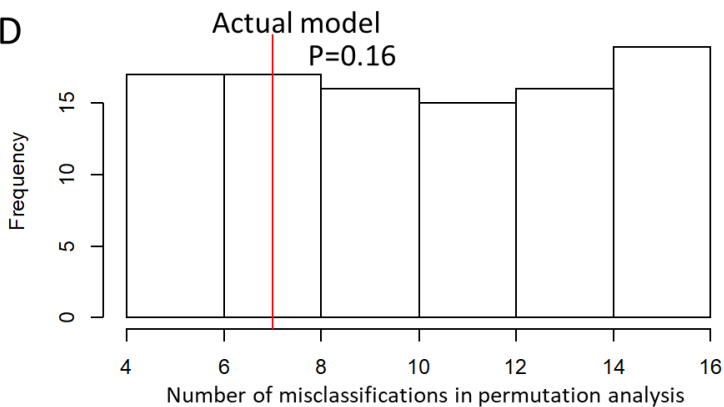

Accuracy of baseline plasma metabolome in discriminating responders from non-responders using random forest algorithm (A and C) and results from permutation analysis (B and D) is presented.
